# Supplementary material
Source: publisher figshare collection journal article supplement (https://acs.figshare.com/ndownloader/files/4060999)
Supplement: Supplementary file 1 [file 4060999]

## Figure S1 - The comparing enrichment analysis between apoptosis and autophagy

The figure shows the complete list of the comparing enrichment analysis, including GO Molecular Function, GO biological process and GO Cellular Component, KEGG pathway and Reactome pathway.

The colour represents the p-value while the number represents the number of proteins associated with each term.

The category with lowest p-value is indicated with a black rectangle around the fill colour.

The column T represents the total number of proteins in the reference set (whole genome) associated to this functional term.

The analysis was done with g:Cocoa in the g:Profiler package.

| AUTOPHAGOSOMES |     |     | P-value  | T     | term ID |            | term domain and name                                  |
|----------------|-----|-----|----------|-------|---------|------------|-------------------------------------------------------|
| APOPTOSIS      |     |     |          |       |         |            |                                                       |
| 12             | 8   | 12  | 5.64e-04 | 37    |         | GO:0042743 | BP hydrogen peroxide metabolic process (1)            |
| 5              | 15  | 23  | 7.44e-06 | 103   |         | GO:0000041 | BP transition metal ion transport (1)                 |
| 4              | 13  | 17  | 4.12e-06 | 55    |         | GO:0006826 | BP iron ion transport (2)                             |
| 8              | 22  |     | 6.60e-03 | 88    |         | GO:0018196 | BP peptidyl-asparagine modification (1)               |
| 8              | 22  | 14  | 2.09e-02 | 94    |         | GO:0006487 | BP protein N-linked glycosylation (1)                 |
| 8              | 22  |     | 5.38e-03 | 87    |         | GO:0018279 | BP protein N-linked glycosylation via asparagine (2)  |
| 2              | 9   |     | 1.92e-03 | 22    |         | GO:0046466 | BP membrane lipid catabolic process (1)               |
| 2              | 7   |     | 1.64e-03 | 12    |         | GO:0019377 | BP glycolipid catabolic process (2)                   |
| 2              | 9   |     | 1.19e-03 | 21    |         | GO:0030149 | BP sphingolipid catabolic process (1)                 |
| 2              | 6   |     | 3.63e-03 | 9     |         | GO:0046479 | BP glycosphingolipid catabolic process (1)            |
| 106            | 153 | 945 | 1.46e-43 | 15771 |         | GO:0008150 | BP biological_process (1)                             |
| 46             | 45  | 367 | 2.79e-48 | 4194  |         | GO:0071840 | BP cellular component organization or biogenesis (2)  |
| 21             | 263 | 154 | 2.43e-22 | 1688  |         | GO:0044085 | BP cellular component biogenesis (3)                  |
| 95             | 123 | 85  | 4.56e-11 | 746   |         | GO:0070271 | BP protein complex biogenesis (4)                     |
| 44             | 59  | 367 | 9.88e-46 | 4077  |         | GO:0016043 | BP cellular component organization (3)                |
| 19             | 24  | 128 | 8.55e-39 | 1181  |         | GO:0043933 | BP macromolecular complex subunit organization (4)    |
| 21             | 38  | 10  | 5.14e-11 | 111   |         | GO:0071826 | BP ribonucleoprotein complex subunit organization (5) |
| 14             | 19  | 116 | 2.11e-32 | 870   |         | GO:0071822 | BP protein complex subunit organization (5)           |
| 37             | 21  | 7   | 1.51e-07 | 184   |         | GO:0071824 | BP protein-DNA complex subunit organization (5)       |
| 72             | 126 | 104 | 2.20e-21 | 647   |         | GO:0061024 | BP membrane organization (4)                          |
| 10             | 23  | 23  | 1.71e-08 | 78    |         | GO:0061025 | BP membrane fusion (5)                                |
| 94             | 105 | 53  | 9.06e-41 | 289   |         | GO:0022411 | BP cellular component disassembly (4)                 |
| 87             | 78  | 43  | 4.93e-30 | 195   |         | GO:0032984 | BP macromolecular complex disassembly (5)             |
| 61             | 73  | 40  | 8.53e-30 | 173   |         | GO:0043241 | BP protein complex disassembly (6)                    |
| 18             | 23  | 144 | 7.56e-16 | 1544  |         | GO:0022607 | BP cellular component assembly (4)                    |
| 145            | 179 | 97  | 5.58e-20 | 1014  |         | GO:0065003 | BP macromolecular complex assembly (5)                |

|     |     |     |          |      |    |            |    |                                                                                    |
|-----|-----|-----|----------|------|----|------------|----|------------------------------------------------------------------------------------|
| 95  | 127 | 85  | 3.71e-11 | 744  | BP | GO:0006461 | BP | protein complex assembly (6)                                                       |
| 32  | 56  |     | 7.21e-06 | 287  | BP | GO:0051259 | BP | protein oligomerization (7)                                                        |
| 18  | 33  |     | 2.36e-03 | 158  | BP | GO:0051260 | BP | protein homooligomerization (8)                                                    |
| 186 | 253 | 189 | 1.20e-16 | 1831 | BP | GO:0016265 | BP | death (2)                                                                          |
| 125 | 174 | 98  | 1.44e-04 | 1342 | BP | GO:0000003 | BP | reproduction (2)                                                                   |
| 508 | 653 | 547 | 5.75e-21 | 7394 | BP | GO:0050896 | BP | response to stimulus (2)                                                           |
| 79  | 110 | 99  | 1.48e-08 | 913  | BP | GO:0009719 | BP | response to endogenous stimulus (3)                                                |
| 46  | 68  | 64  | 1.64e-05 | 564  | BP | GO:0071495 | BP | cellular response to endogenous stimulus (4)                                       |
| 100 | 119 | 114 | 1.75e-04 | 1308 | BP | GO:0009605 | BP | response to external stimulus (3)                                                  |
| 24  | 131 | 284 | 7.51e-21 | 2970 | BP | GO:0042221 | BP | response to chemical stimulus (3)                                                  |
| 159 | 218 | 178 | 1.59e-11 | 1889 | BP | GO:0010033 | BP | response to organic substance (4)                                                  |
| 62  | 92  | 79  | 3.65e-06 | 736  | BP | GO:0009725 | BP | response to hormone stimulus (5)                                                   |
| 38  | 65  |     | 6.57e-04 | 400  | BP | GO:0043434 | BP | response to peptide hormone stimulus (6)                                           |
| 24  | 49  |     | 1.85e-04 | 259  | BP | GO:0032868 | BP | response to insulin stimulus (7)                                                   |
| 19  | 27  | 22  | 3.14e-02 | 150  | BP | GO:0010243 | BP | response to organic nitrogen (5)                                                   |
| 33  | 49  | 40  | 4.24e-02 | 373  | BP | GO:0042493 | BP | response to drug (4)                                                               |
| 11  | 17  | 18  | 4.90e-03 | 95   | BP | GO:0001101 | BP | response to acid (4)                                                               |
| 48  | 51  | 48  | 1.71e-05 | 368  | BP | GO:0010035 | BP | response to inorganic substance (4)                                                |
| 24  | 33  | 33  | 2.39e-03 | 248  | BP | GO:0010038 | BP | response to metal ion (5)                                                          |
| 282 | 336 | 276 | 5.30e-15 | 3189 | BP | GO:0006950 | BP | response to stress (3)                                                             |
| 23  | 36  | 24  | 3.84e-05 | 154  | BP | GO:0035966 | BP | response to topologically incorrect protein (4)                                    |
| 21  | 35  | 23  | 1.70e-05 | 143  | BP | GO:0006986 | BP | response to unfolded protein (5)                                                   |
| 88  | 85  | 124 | 7.06e-11 | 1161 | BP | GO:0009611 | BP | response to wounding (4)                                                           |
| 62  | 60  | 91  | 3.01e-14 | 651  | BP | GO:0042060 | BP | wound healing (5)                                                                  |
| 37  | 33  | 34  | 4.81e-04 | 245  | BP | GO:0006979 | BP | response to oxidative stress (4)                                                   |
| 23  | 17  | 19  | 9.55e-04 | 117  | BP | GO:0000302 | BP | response to reactive oxygen species (5)                                            |
| 18  | 15  |     | 3.93e-03 | 83   | BP | GO:0042542 | BP | response to hydrogen peroxide (6)                                                  |
| 13  | 27  | 9   | 3.66e-05 | 96   | BP | GO:0042594 | BP | response to starvation (4)                                                         |
| 67  | 82  | 597 | 1.18e-11 | 9059 | BP | GO:0065007 | BP | biological regulation (2)                                                          |
| 177 | 217 | 171 | 1.34e-08 | 1931 | BP | GO:0065009 | BP | regulation of molecular function (3)                                               |
| 118 | 158 | 121 | 1.07e-09 | 1165 | BP | GO:0044093 | BP | positive regulation of molecular function (4)                                      |
| 68  | 86  | 86  | 7.41e-10 | 705  | BP | GO:0044092 | BP | negative regulation of molecular function (4)                                      |
| 207 | 238 | 238 | 4.84e-18 | 2472 | BP | GO:0065008 | BP | regulation of biological quality (3)                                               |
| 89  | 105 | 97  | 1.15e-02 | 1162 | BP | GO:0042592 | BP | homeostatic process (4)                                                            |
| 29  | 23  | 20  | 4.76e-02 | 208  | BP | GO:0060249 | BP | anatomical structure homeostasis (5)                                               |
| 49  | 55  | 87  | 1.43e-03 | 961  | BP | GO:0022610 | BP | biological adhesion (2)                                                            |
| 91  | 82  | 105 | 1.97e-05 | 1184 | BP | GO:0040011 | BP | locomotion (2)                                                                     |
| 54  | 51  | 60  | 3.10e-03 | 596  | BP | GO:0042330 | BP | taxis (3)                                                                          |
| 54  | 51  | 60  | 3.10e-03 | 596  | BP | GO:0006935 | BP | chemotaxis (4)                                                                     |
| 314 | 416 | 375 | 6.77e-16 | 4796 | BP | GO:0023052 | BP | signaling (2)                                                                      |
| 141 | 179 | 175 | 2.63e-10 | 1962 | BP | GO:0002376 | BP | immune system process (2)                                                          |
| 19  | 52  | 56  | 2.60e-12 | 316  | BP | GO:0019882 | BP | antigen processing and presentation (3)                                            |
| 17  | 42  | 46  | 1.29e-16 | 176  | BP | GO:0019884 | BP | antigen processing and presentation of exogenous antigen (4)                       |
| 18  | 50  | 52  | 2.62e-18 | 206  | BP | GO:0048002 | BP | antigen processing and presentation of peptide antigen (4)                         |
| 16  | 40  | 46  | 7.76e-17 | 174  | BP | GO:0002478 | BP | antigen processing and presentation of exogenous peptide antigen (5)               |
| 18  | 50  | 52  | 1.18e-21 | 177  | BP | GO:0002474 | BP | antigen processing and presentation of peptide antigen via MHC class I (5)         |
| 16  | 40  | 46  | 8.80e-20 | 150  | BP | GO:0042590 | BP | antigen processing and presentation of exogenous peptide antigen via MHC cl... (6) |
| 15  | 39  | 42  | 1.05e-16 | 146  | BP | GO:0002479 | BP | antigen processing and presentation of exogenous peptide antigen via MHC cl... (7) |
| 243 | 118 | 625 | 9.09e-77 | 9718 | BP | GO:0008152 | BP | metabolic process (2)                                                              |
| 789 | 105 | 564 | 1.82e-59 | 8915 | BP | GO:0044238 | BP | primary metabolic process (3)                                                      |
| 57  | 117 | 70  | 9.63e-08 | 743  | BP | GO:0005975 | BP | carbohydrate metabolic process (4)                                                 |
| 239 | 475 | 301 | 1.27e-46 | 2685 | BP | GO:0044281 | BP | small molecule metabolic process (3)                                               |
| 45  | 88  | 56  | 1.27e-04 | 578  | BP | GO:0006066 | BP | alcohol metabolic process (4)                                                      |
| 67  | 87  | 416 | 6.49e-42 | 7363 | BP | GO:0043170 | BP | macromolecule metabolic process (3)                                                |
| 206 | 303 | 188 | 1.74e-07 | 2521 | BP | GO:0043412 | BP | macromolecule modification (4)                                                     |
| 448 | 548 | 217 | 5.69e-33 | 4380 | BP | GO:0010467 | BP | gene expression (4)                                                                |
| 368 | 547 | 321 | 7.92e-35 | 3849 | BP | GO:0019538 | BP | protein metabolic process (4)                                                      |
| 85  | 124 | 101 | 5.38e-07 | 1000 | BP | GO:0006508 | BP | proteolysis (5)                                                                    |
| 467 | 604 | 280 | 1.41e-23 | 5092 | BP | GO:0009058 | BP | biosynthetic process (3)                                                           |

|     |     |     |          |       |            |    |                                                                     |
|-----|-----|-----|----------|-------|------------|----|---------------------------------------------------------------------|
| 48  | 76  | 42  | 1.22e-07 | 408   | GO:0044283 | BP | small molecule biosynthetic process (4)                             |
| 17  | 27  | 20  | 4.30e-04 | 107   | GO:0046165 | BP | alcohol biosynthetic process (5)                                    |
| 385 | 460 | 187 | 4.40e-19 | 4125  | GO:0009059 | BP | macromolecule biosynthetic process (4)                              |
| 23  | 38  | 24  | 8.25e-03 | 205   | GO:0016051 | BP | carbohydrate biosynthetic process (4)                               |
| 71  | 15  | 68  | 5.50e-27 | 681   | GO:0055114 | BP | oxidation-reduction process (3)                                     |
| 262 | 315 | 277 | 5.94e-70 | 2023  | GO:0009056 | BP | catabolic process (3)                                               |
| 140 | 135 | 122 | 5.60e-35 | 892   | GO:0009057 | BP | macromolecule catabolic process (4)                                 |
| 64  | 93  | 71  | 1.74e-09 | 535   | GO:0030163 | BP | protein catabolic process (5)                                       |
| 39  | 75  | 27  | 9.58e-14 | 309   | GO:0044282 | BP | small molecule catabolic process (4)                                |
| 18  | 36  | 19  | 1.21e-08 | 118   | GO:0046164 | BP | alcohol catabolic process (5)                                       |
| 20  | 43  | 31  | 5.99e-08 | 167   | GO:0016052 | BP | carbohydrate catabolic process (4)                                  |
| 582 | 780 | 360 | 8.52e-47 | 5813  | GO:0006807 | BP | nitrogen compound metabolic process (3)                             |
| 59  | 13  | 92  | 8.73e-20 | 640   | GO:0009308 | BP | amine metabolic process (4)                                         |
| 11  | 27  | 7   | 8.04e-03 | 123   | GO:0009310 | BP | amine catabolic process (5)                                         |
| 102 | 14  | 275 | 1.44e-70 | 13431 | GO:0009987 | BP | cellular process (2)                                                |
| 5   | 6   | 12  | 8.80e-05 | 32    | GO:0022406 | BP | membrane docking (3)                                                |
| 387 | 512 | 276 | 4.31e-45 | 3307  | GO:0071841 | BP | cellular component organization or biogenesis at cellular level (3) |
| 49  | 69  | 19  | 1.14e-15 | 250   | GO:0071843 | BP | cellular component biogenesis at cellular level (4)                 |
| 49  | 69  | 19  | 4.56e-17 | 237   | GO:0022613 | BP | ribonucleoprotein complex biogenesis (5)                            |
| 34  | 40  | 15  | 4.20e-08 | 152   | GO:0042254 | BP | ribosome biogenesis (6)                                             |
| 7   | 4   | 5   | 1.61e-02 | 14    | GO:0042273 | BP | ribosomal large subunit biogenesis (6)                              |
| 8   | 10  | 7   | 1.81e-03 | 19    | GO:0042274 | BP | ribosomal small subunit biogenesis (6)                              |
| 374 | 432 | 276 | 1.04e-41 | 3205  | GO:0071842 | BP | cellular component organization at cellular level (4)               |
| 94  | 145 | 53  | 2.03e-42 | 278   | GO:0071845 | BP | cellular component disassembly at cellular level (5)                |
| 152 | 174 | 82  | 1.06e-39 | 738   | GO:0034621 | BP | cellular macromolecular complex subunit organization (5)            |
| 67  | 78  | 43  | 2.33e-32 | 183   | GO:0034623 | BP | cellular macromolecular complex disassembly (6)                     |
| 61  | 73  | 40  | 2.43e-32 | 161   | GO:0043624 | BP | cellular protein complex disassembly (7)                            |
| 18  | 12  | 9   | 9.85e-06 | 58    | GO:0051261 | BP | protein depolymerization (8)                                        |
| 140 | 165 | 102 | 4.77e-13 | 1145  | GO:0071844 | BP | cellular component assembly at cellular level (5)                   |
| 100 | 107 | 51  | 1.19e-18 | 582   | GO:0034622 | BP | cellular macromolecular complex assembly (6)                        |
| 32  | 18  | 6   | 1.40e-05 | 169   | GO:0065004 | BP | protein-DNA complex assembly (7)                                    |
| 48  | 53  | 37  | 5.59e-06 | 315   | GO:0043623 | BP | cellular protein complex assembly (7)                               |
| 27  | 26  | 21  | 3.48e-03 | 163   | GO:0051258 | BP | protein polymerization (8)                                          |
| 21  | 37  | 9   | 3.95e-11 | 105   | GO:0022618 | BP | ribonucleoprotein complex assembly (7)                              |
| 256 | 332 | 168 | 9.48e-30 | 2055  | GO:0006996 | BP | organelle organization (5)                                          |
| 48  | 63  | 22  | 7.05e-04 | 384   | GO:0048285 | BP | organelle fission (6)                                               |
| 46  | 58  | 22  | 4.94e-03 | 369   | GO:0000280 | BP | nuclear division (7)                                                |
| 14  | 26  | 10  | 9.74e-05 | 94    | GO:0070925 | BP | organelle assembly (6)                                              |
| 2   | 19  | 12  | 6.33e-05 | 53    | GO:0007033 | BP | vacuole organization (6)                                            |
| 15  | 39  | 20  | 1.73e-15 | 90    | GO:0016050 | BP | vesicle organization (6)                                            |
| 95  | 94  | 20  | 8.84e-09 | 754   | GO:0051276 | BP | chromosome organization (6)                                         |
| 19  | 15  | 4   | 5.52e-04 | 81    | GO:0032200 | BP | telomere organization (7)                                           |
| 67  | 53  | 15  | 5.09e-04 | 582   | GO:0006325 | BP | chromatin organization (7)                                          |
| 34  | 18  | 5   | 2.67e-07 | 162   | GO:0034728 | BP | nucleosome organization (8)                                         |
| 34  | 18  | 6   | 2.73e-06 | 176   | GO:0006333 | BP | chromatin assembly or disassembly (8)                               |
| 7   | 14  | 9   | 8.04e-03 | 41    | GO:0048284 | BP | organelle fusion (6)                                                |
| 13  | 45  | 15  | 2.42e-07 | 187   | GO:0007005 | BP | mitochondrion organization (6)                                      |
| 105 | 110 | 82  | 4.26e-14 | 767   | GO:0007010 | BP | cytoskeleton organization (6)                                       |
| 85  | 91  | 97  | 9.53e-09 | 880   | GO:0030030 | BP | cell projection organization (5)                                    |
| 18  | 34  | 6   | 1.49e-04 | 148   | GO:0007059 | BP | chromosome segregation (3)                                          |
| 66  | 54  | 86  | 6.34e-06 | 839   | GO:0001775 | BP | cell activation (3)                                                 |
| 67  | 69  | 65  | 7.60e-11 | 436   | GO:0030029 | BP | actin filament-based process (3)                                    |
| 12  | 3   |     | 5.88e-03 | 40    | GO:0070252 | BP | actin-mediated cell contraction (4)                                 |
| 55  | 63  | 61  | 1.21e-10 | 397   | GO:0030036 | BP | actin cytoskeleton organization (4)                                 |
| 35  | 36  | 31  | 5.16e-05 | 206   | GO:0007015 | BP | actin filament organization (5)                                     |
| 17  | 12  |     | 3.97e-03 | 75    | GO:0051017 | BP | actin filament bundle assembly (6)                                  |
| 51  | 48  | 20  | 2.06e-04 | 385   | GO:0007017 | BP | microtubule-based process (3)                                       |
| 44  | 36  | 14  | 2.78e-06 | 269   | GO:0000226 | BP | microtubule cytoskeleton organization (4)                           |

|     |     |     |          |      |            |    |                                                                  |
|-----|-----|-----|----------|------|------------|----|------------------------------------------------------------------|
| 20  | 8   | 4   | 1.60e-06 | 65   | GO:0031023 | BP | microtubule organizing center organization (5)                   |
| 17  | 8   | 4   | 1.22e-04 | 60   | GO:0051297 | BP | centrosome organization (6)                                      |
| 13  | 7   | 2   | 8.06e-03 | 48   | GO:0031109 | BP | microtubule polymerization or depolymerization (5)               |
| 17  | 20  | 28  | 1.16e-03 | 185  | GO:0034330 | BP | cell junction organization (3)                                   |
| 7   | 15  | 19  | 2.75e-02 | 117  | GO:0045216 | BP | cell-cell junction organization (4)                              |
| 15  | 18  | 25  | 4.57e-03 | 165  | GO:0034329 | BP | cell junction assembly (4)                                       |
| 182 | 224 | 124 | 1.11e-19 | 1437 | GO:0007049 | BP | cell cycle (3)                                                   |
| 118 | 137 | 77  | 7.79e-17 | 799  | GO:0000278 | BP | mitotic cell cycle (4)                                           |
| 321 | 433 | 387 | 2.72e-16 | 4905 | GO:0007154 | BP | cell communication (3)                                           |
| 65  | 58  | 35  | 8.10e-07 | 474  | GO:0051301 | BP | cell division (3)                                                |
| 98  | 93  | 102 | 2.69e-05 | 1090 | GO:0006928 | BP | cellular component movement (3)                                  |
| 18  | 9   |     | 3.75e-06 | 55   | GO:0030048 | BP | actin filament-based movement (4)                                |
| 11  | 3   |     | 3.00e-02 | 39   | GO:0033275 | BP | actin-myosin filament sliding (5)                                |
| 11  | 3   |     | 3.00e-02 | 39   | GO:0030049 | BP | muscle filament sliding (6)                                      |
| 389 | 503 | 399 | 1.09e-14 | 5209 | GO:0051716 | BP | cellular response to stimulus (3)                                |
| 15  | 197 | 115 | 4.83e-18 | 1170 | GO:0033554 | BP | cellular response to stress (4)                                  |
| 13  | 25  | 15  | 9.59e-04 | 98   | GO:0034976 | BP | response to endoplasmic reticulum stress (5)                     |
| 85  | 117 | 61  | 1.11e-12 | 632  | GO:0006974 | BP | response to DNA damage stimulus (5)                              |
| 141 | 182 | 161 | 2.86e-12 | 1614 | GO:0070887 | BP | cellular response to chemical stimulus (4)                       |
| 103 | 142 | 113 | 1.25e-07 | 1223 | GO:0071310 | BP | cellular response to organic substance (5)                       |
| 33  | 58  | 46  | 4.47e-03 | 416  | GO:0032870 | BP | cellular response to hormone stimulus (6)                        |
| 27  | 51  |     | 1.51e-03 | 293  | GO:0071375 | BP | cellular response to peptide hormone stimulus (7)                |
| 21  | 44  |     | 5.09e-05 | 212  | GO:0032869 | BP | cellular response to insulin stimulus (8)                        |
| 5   | 6   | 12  | 5.64e-04 | 37   | GO:0071377 | BP | cellular response to glucagon stimulus (8)                       |
| 14  | 23  | 14  | 4.86e-03 | 93   | GO:0035967 | BP | cellular response to topologically incorrect protein (6)         |
| 12  | 23  | 14  | 6.96e-04 | 84   | GO:0034620 | BP | cellular response to unfolded protein (7)                        |
| 23  | 20  |     | 1.01e-05 | 93   | GO:0034599 | BP | cellular response to oxidative stress (5)                        |
| 19  | 14  |     | 1.12e-05 | 65   | GO:0034614 | BP | cellular response to reactive oxygen species (6)                 |
| 13  | 12  |     | 2.71e-03 | 44   | GO:0070301 | BP | cellular response to hydrogen peroxide (7)                       |
| 13  | 20  | 17  | 2.79e-02 | 97   | GO:0000910 | BP | cytokinesis (3)                                                  |
| 148 | 176 | 93  | 2.37e-16 | 1106 | GO:0022402 | BP | cell cycle process (3)                                           |
| 123 | 144 | 81  | 2.63e-17 | 905  | GO:0022403 | BP | cell cycle phase (4)                                             |
| 65  | 79  | 28  | 3.88e-04 | 554  | GO:0000279 | BP | M phase (5)                                                      |
| 48  | 58  | 23  | 2.03e-03 | 380  | GO:0000087 | BP | M phase of mitotic cell cycle (6)                                |
| 74  | 82  | 56  | 2.48e-12 | 446  | GO:0051325 | BP | interphase (5)                                                   |
| 74  | 82  | 54  | 2.50e-13 | 428  | GO:0051329 | BP | interphase of mitotic cell cycle (6)                             |
| 36  | 53  | 37  | 1.38e-14 | 166  | GO:0051320 | BP | S phase (5)                                                      |
| 36  | 52  | 36  | 1.68e-16 | 147  | GO:0000084 | BP | S phase of mitotic cell cycle (6)                                |
| 46  | 58  | 22  | 4.94e-03 | 369  | GO:0007067 | BP | mitosis (5)                                                      |
| 14  | 21  | 4   | 4.14e-02 | 91   | GO:0000236 | BP | mitotic prometaphase (5)                                         |
| 21  | 44  | 33  | 1.26e-19 | 93   | GO:0000216 | BP | M/G1 transition of mitotic cell cycle (4)                        |
| 41  | 57  | 42  | 1.46e-10 | 228  | GO:0000082 | BP | G1/S transition of mitotic cell cycle (4)                        |
| 6   | 12  | 1   | 1.29e-02 | 32   | GO:0007062 | BP | sister chromatid cohesion (4)                                    |
| 7   | 16  |     | 1.78e-02 | 55   | GO:0000819 | BP | sister chromatid segregation (4)                                 |
| 49  | 55  | 87  | 1.43e-03 | 961  | GO:0007155 | BP | cell adhesion (3)                                                |
| 786 | 115 | 577 | 4.69e-79 | 8733 | GO:0044237 | BP | cellular metabolic process (3)                                   |
| 237 | 375 | 241 | 3.59e-69 | 1729 | GO:0044248 | BP | cellular catabolic process (4)                                   |
| 8   | 32  | 13  | 1.85e-10 | 84   | GO:0006914 | BP | autophagy (5)                                                    |
| 635 | 821 | 372 | 1.07e-45 | 6658 | GO:0044260 | BP | cellular macromolecule metabolic process (4)                     |
| 34  | 49  | 283 | 7.00e-43 | 3213 | GO:0044267 | BP | cellular protein metabolic process (5)                           |
| 50  | 65  | 39  | 2.73e-14 | 239  | GO:0006457 | BP | protein folding (6)                                              |
| 14  | 22  | 16  | 4.62e-05 | 68   | GO:0006458 | BP | 'de novo' protein folding (7)                                    |
| 13  | 21  | 15  | 3.85e-05 | 62   | GO:0051084 | BP | 'de novo' posttranslational protein folding (8)                  |
| 196 | 294 | 184 | 1.03e-07 | 2419 | GO:0006464 | BP | protein modification process (6)                                 |
| 57  | 104 | 59  | 4.09e-11 | 529  | GO:0070647 | BP | protein modification by small protein conjugation or removal (7) |
| 53  | 87  | 55  | 3.82e-09 | 465  | GO:0032446 | BP | protein modification by small protein conjugation (8)            |
| 50  | 80  | 54  | 1.04e-07 | 438  | GO:0016567 | BP | protein ubiquitination (9)                                       |
| 23  | 46  | 41  | 1.75e-12 | 178  | GO:0000209 | BP | protein polyubiquitination (10)                                  |
| 13  | 47  | 101 | 2.26e-37 | 731  | GO:0044265 | BP | cellular macromolecule catabolic process (5)                     |

|     |     |     |          |      |    |            |    |                                                                                     |
|-----|-----|-----|----------|------|----|------------|----|-------------------------------------------------------------------------------------|
| 53  | 79  | 57  | 2.72e-08 | 419  | BP | GO:0043632 | BP | cellular macromolecule catabolic process (3)                                        |
| 56  | 82  | 61  | 1.30e-08 | 441  | BP | GO:0044257 | BP | modification-dependent macromolecule catabolic process (6)                          |
| 56  | 81  | 60  | 1.49e-08 | 431  | BP | GO:0051603 | BP | cellular protein catabolic process (6)                                              |
| 36  | 57  | 52  | 8.25e-15 | 244  | BP | GO:0010498 | BP | proteolysis involved in cellular protein catabolic process (7)                      |
| 53  | 77  | 57  | 9.57e-08 | 416  | BP | GO:0019941 | BP | proteasomal protein catabolic process (8)                                           |
| 52  | 75  | 56  | 1.61e-07 | 410  | BP | GO:0006511 | BP | modification-dependent protein catabolic process (8)                                |
| 35  | 56  | 49  | 2.86e-13 | 237  | BP | GO:0043161 | BP | ubiquitin-dependent protein catabolic process (9)                                   |
| 17  | 39  | 34  | 3.68e-16 | 97   | BP | GO:0031145 | BP | proteasomal ubiquitin-dependent protein catabolic process (10)                      |
| 27  | 65  | 24  | 1.40e-12 | 257  | BP | GO:0051186 | BP | anaphase-promoting complex-dependent proteasomal ubiquitin-dependent protei... (11) |
| 24  | 54  | 20  | 2.13e-11 | 200  | BP | GO:0006732 | BP | cofactor metabolic process (4)                                                      |
| 12  | 22  | 11  | 1.01e-06 | 57   | BP | GO:0006733 | BP | coenzyme metabolic process (5)                                                      |
| 7   | 22  | 4   | 1.68e-08 | 48   | BP | GO:0006084 | BP | oxidoreduction coenzyme metabolic process (6)                                       |
| 9   | 18  | 4   | 6.80e-07 | 38   | BP | GO:0051187 | BP | acetyl-CoA metabolic process (6)                                                    |
| 7   | 17  | 3   | 1.05e-07 | 31   | BP | GO:0009109 | BP | cofactor catabolic process (5)                                                      |
| 6   | 17  | 3   | 1.87e-09 | 26   | BP | GO:0046356 | BP | coenzyme catabolic process (6)                                                      |
| 60  | 114 | 64  | 9.16e-23 | 461  | BP | GO:0006091 | BP | acetyl-CoA catabolic process (7)                                                    |
| 19  | 45  | 16  | 7.28e-11 | 151  | BP | GO:0022900 | BP | generation of precursor metabolites and energy (4)                                  |
| 43  | 89  | 41  | 2.87e-19 | 338  | BP | GO:0015980 | BP | electron transport chain (5)                                                        |
| 20  | 29  | 26  | 7.16e-03 | 180  | BP | GO:0006112 | BP | energy derivation by oxidation of organic compounds (5)                             |
| 21  | 59  | 15  | 4.70e-21 | 154  | BP | GO:0045333 | BP | energy reserve metabolic process (6)                                                |
| 8   | 23  | 5   | 9.77e-12 | 40   | BP | GO:0009060 | BP | cellular respiration (6)                                                            |
| 6   | 17  | 3   | 1.87e-09 | 26   | BP | GO:0006099 | BP | aerobic respiration (7)                                                             |
| 15  | 41  | 10  | 4.69e-13 | 113  | BP | GO:0022904 | BP | tricarboxylic acid cycle (8)                                                        |
| 3   | 24  | 5   | 7.07e-07 | 66   | BP | GO:0006119 | BP | respiratory electron transport chain (7)                                            |
| 2   | 19  | 3   | 3.33e-04 | 58   | BP | GO:0042773 | BP | oxidative phosphorylation (5)                                                       |
| 2   | 19  | 3   | 3.33e-04 | 58   | BP | GO:0042775 | BP | ATP synthesis coupled electron transport (6)                                        |
| 1   | 14  | 2   | 2.05e-02 | 44   | BP | GO:0006120 | BP | mitochondrial ATP synthesis coupled electron transport (7)                          |
| 106 | 183 | 143 | 2.50e-23 | 1040 | BP | GO:0046483 | BP | mitochondrial electron transport, NADH to ubiquinone (8)                            |
| 67  | 104 | 99  | 2.91e-22 | 580  | BP | GO:0046700 | BP | heterocycle metabolic process (4)                                                   |
| 453 | 593 | 272 | 4.08e-23 | 4997 | BP | GO:0044249 | BP | heterocycle catabolic process (5)                                                   |
| 4   | 11  | 4   | 4.04e-02 | 30   | BP | GO:0043094 | BP | cellular biosynthetic process (4)                                                   |
| 30  | 60  | 42  | 7.72e-04 | 360  | BP | GO:0018130 | BP | cellular metabolic compound salvage (5)                                             |
| 7   | 32  | 11  | 2.84e-04 | 138  | BP | GO:0051188 | BP | heterocycle biosynthetic process (5)                                                |
| 6   | 23  | 10  | 2.15e-02 | 101  | BP | GO:0009108 | BP | cofactor biosynthetic process (5)                                                   |
| 378 | 452 | 179 | 1.01e-18 | 4043 | BP | GO:0034645 | BP | coenzyme biosynthetic process (6)                                                   |
| 103 | 107 | 74  | 2.25e-50 | 511  | BP | GO:0006412 | BP | cellular macromolecule biosynthetic process (5)                                     |
| 43  | 60  | 30  | 2.63e-35 | 100  | BP | GO:0006415 | BP | translation (6)                                                                     |
| 49  | 66  | 35  | 4.81e-36 | 119  | BP | GO:0006414 | BP | translational termination (7)                                                       |
| 58  | 75  | 352 | 2.44e-49 | 5706 | BP | GO:0034641 | BP | translational elongation (6)                                                        |
| 81  | 132 | 121 | 1.44e-23 | 787  | BP | GO:0072521 | BP | cellular nitrogen compound metabolic process (4)                                    |
| 68  | 107 | 101 | 2.70e-23 | 583  | BP | GO:0044270 | BP | purine-containing compound metabolic process (5)                                    |
| 63  | 99  | 88  | 1.09e-25 | 517  | BP | GO:0072523 | BP | cellular nitrogen compound catabolic process (5)                                    |
| 58  | 130 | 83  | 3.36e-24 | 551  | BP | GO:0044106 | BP | purine-containing compound catabolic process (6)                                    |
| 12  | 22  | 11  | 1.68e-08 | 48   | BP | GO:0072524 | BP | cellular amine metabolic process (5)                                                |
| 51  | 86  | 56  | 4.84e-05 | 549  | BP | GO:0044271 | BP | pyridine-containing compound metabolic process (5)                                  |
| 22  | 36  | 33  | 6.87e-03 | 260  | BP | GO:0072522 | BP | cellular nitrogen compound biosynthetic process (5)                                 |
| 55  | 65  | 319 | 4.61e-49 | 5279 | BP | GO:0006139 | BP | purine-containing compound biosynthetic process (6)                                 |
| 46  | 549 | 197 | 2.05e-37 | 4463 | BP | GO:0090304 | BP | nucleobase-containing compound metabolic process (5)                                |
| 17  | 17  | 6   | 3.87e-05 | 56   | BP | GO:0090305 | BP | nucleic acid metabolic process (6)                                                  |
| 125 | 130 | 44  | 9.48e-15 | 925  | BP | GO:0006259 | BP | nucleic acid phosphodiester bond hydrolysis (7)                                     |
| 42  | 38  | 6   | 9.61e-08 | 225  | BP | GO:0071103 | BP | DNA metabolic process (7)                                                           |
| 8   | 11  | 2   | 4.04e-02 | 30   | BP | GO:0032392 | BP | DNA conformation change (8)                                                         |
| 8   | 11  | 2   | 2.77e-02 | 29   | BP | GO:0032508 | BP | DNA geometric change (9)                                                            |
| 35  | 27  | 5   | 6.77e-06 | 191  | BP | GO:0006323 | BP | DNA duplex unwinding (10)                                                           |
| 29  | 14  | 5   | 8.20e-05 | 154  | BP | GO:0031497 | BP | DNA packaging (9)                                                                   |
| 28  | 13  | 4   | 5.85e-05 | 143  | BP | GO:0006334 | BP | chromatin assembly (10)                                                             |
| 33  | 38  | 9   | 2.82e-03 | 221  | BP | GO:0006310 | BP | nucleosome assembly (11)                                                            |
| 11  | 11  | 2   | 1.71e-02 | 37   | BP | GO:0006312 | BP | DNA recombination (8)                                                               |
|     |     |     |          |      |    |            |    | mitotic recombination (9)                                                           |

|     |     |     |          |      |            |    |                                                                                     |
|-----|-----|-----|----------|------|------------|----|-------------------------------------------------------------------------------------|
| 15  | 13  | 2   | 1.09e-06 | 35   | GO:0022616 | BP | DNA strand elongation (8)                                                           |
| 46  | 51  | 14  | 2.55e-07 | 269  | GO:0006260 | BP | DNA replication (8)                                                                 |
| 18  | 22  | 2   | 8.07e-03 | 89   | GO:0006261 | BP | DNA-dependent DNA replication (9)                                                   |
| 15  | 13  | 2   | 2.26e-07 | 32   | GO:0006271 | BP | DNA strand elongation involved in DNA replication (10)                              |
| 5   | 6   |     | 1.85e-02 | 8    | GO:0006268 | BP | DNA unwinding involved in replication (10)                                          |
| 56  | 64  | 18  | 7.11e-06 | 401  | GO:0006281 | BP | DNA repair (8)                                                                      |
| 19  | 15  | 4   | 4.47e-04 | 80   | GO:0000723 | BP | telomere maintenance (8)                                                            |
| 12  | 10  | 3   | 7.86e-03 | 41   | GO:0010833 | BP | telomere maintenance via telomere lengthening (9)                                   |
| 9   | 7   |     | 1.39e-02 | 24   | GO:0032201 | BP | telomere maintenance via semi-conservative replication (10)                         |
| 9   | 7   | 2   | 4.22e-02 | 27   | GO:0000722 | BP | telomere maintenance via recombination (9)                                          |
| 394 | 475 | 173 | 3.91e-27 | 3890 | GO:0016070 | BP | RNA metabolic process (7)                                                           |
| 283 | 291 | 115 | 5.78e-11 | 3193 | GO:0032774 | BP | RNA biosynthetic process (8)                                                        |
| 25  | 237 | 90  | 4.58e-04 | 3100 | GO:0006351 | BP | transcription, DNA-dependent (9)                                                    |
| 12  | 115 | 34  | 4.05e-03 | 1310 | GO:0006366 | BP | transcription from RNA polymerase II promoter (10)                                  |
| 17  | 21  | 1   | 1.34e-02 | 85   | GO:0006353 | BP | transcription termination, DNA-dependent (9)                                        |
| 14  | 18  | 1   | 8.14e-06 | 43   | GO:0006369 | BP | termination of RNA polymerase II transcription (10)                                 |
| 37  | 83  | 25  | 3.90e-18 | 312  | GO:0034660 | BP | ncRNA metabolic process (8)                                                         |
| 23  | 34  | 10  | 9.32e-08 | 114  | GO:0016072 | BP | rRNA metabolic process (9)                                                          |
| 11  | 35  | 13  | 3.65e-05 | 147  | GO:0006399 | BP | tRNA metabolic process (9)                                                          |
| 174 | 243 | 84  | 1.08e-89 | 671  | GO:0016071 | BP | mRNA metabolic process (8)                                                          |
| 135 | 175 | 31  | 4.25e-39 | 679  | GO:0006396 | BP | RNA processing (8)                                                                  |
| 29  | 48  | 13  | 1.30e-06 | 217  | GO:0034470 | BP | ncRNA processing (9)                                                                |
| 23  | 34  | 10  | 1.74e-08 | 108  | GO:0006364 | BP | rRNA processing (10)                                                                |
| 27  | 27  | 8   | 1.31e-09 | 87   | GO:0031123 | BP | RNA 3'-end processing (9)                                                           |
| 87  | 111 | 13  | 5.15e-33 | 341  | GO:0008380 | BP | RNA splicing (9)                                                                    |
| 71  | 91  | 7   | 6.96e-36 | 225  | GO:0000375 | BP | RNA splicing, via transesterification reactions (10)                                |
| 68  | 90  | 7   | 6.08e-36 | 220  | GO:0000377 | BP | RNA splicing, via transesterification reactions with bulged adenosine as nu... (11) |
| 101 | 121 | 14  | 2.21e-31 | 418  | GO:0006397 | BP | mRNA processing (9)                                                                 |
| 25  | 24  | 6   | 7.64e-10 | 73   | GO:0031124 | BP | mRNA 3'-end processing (10)                                                         |
| 68  | 90  | 7   | 6.08e-36 | 220  | GO:0000398 | BP | nuclear mRNA splicing, via spliceosome (10)                                         |
| 9   | 8   |     | 9.15e-03 | 23   | GO:0000380 | BP | alternative nuclear mRNA splicing, via spliceosome (11)                             |
| 4   | 14  | 2   | 3.59e-04 | 33   | GO:0000387 | BP | spliceosomal snRNP assembly (11)                                                    |
| 10  | 15  | 1   | 7.06e-03 | 46   | GO:0000245 | BP | spliceosome assembly (11)                                                           |
| 61  | 88  | 36  | 6.53e-33 | 227  | GO:0006401 | BP | RNA catabolic process (8)                                                           |
| 57  | 83  | 35  | 1.59e-33 | 200  | GO:0006402 | BP | mRNA catabolic process (9)                                                          |
| 57  | 81  | 35  | 1.33e-35 | 181  | GO:0000956 | BP | nuclear-transcribed mRNA catabolic process (10)                                     |
| 50  | 68  | 32  | 7.19e-36 | 127  | GO:0000184 | BP | nuclear-transcribed mRNA catabolic process, nonsense-mediated decay (11)            |
| 31  | 49  | 39  | 1.12e-03 | 310  | GO:0034654 | BP | nucleobase-containing compound biosynthetic process (6)                             |
| 65  | 103 | 101 | 1.70e-24 | 554  | GO:0034655 | BP | nucleobase-containing compound catabolic process (6)                                |
| 104 | 169 | 141 | 1.08e-27 | 913  | GO:0055086 | BP | nucleobase-containing small molecule metabolic process (6)                          |
| 97  | 159 | 133 | 3.40e-26 | 866  | GO:0006753 | BP | nucleoside phosphate metabolic process (7)                                          |
| 97  | 159 | 133 | 3.40e-26 | 866  | GO:0009117 | BP | nucleotide metabolic process (8)                                                    |
| 70  | 117 | 107 | 2.39e-29 | 550  | GO:0009259 | BP | ribonucleotide metabolic process (9)                                                |
| 64  | 109 | 101 | 6.70e-27 | 528  | GO:0009141 | BP | nucleoside triphosphate metabolic process (9)                                       |
| 62  | 105 | 101 | 4.35e-27 | 516  | GO:0009199 | BP | ribonucleoside triphosphate metabolic process (10)                                  |
| 12  | 22  | 11  | 1.68e-08 | 48   | GO:0019362 | BP | pyridine nucleotide metabolic process (9)                                           |
| 12  | 22  | 11  | 3.26e-09 | 45   | GO:0046496 | BP | nicotinamide nucleotide metabolic process (10)                                      |
| 6   | 11  | 7   | 1.75e-03 | 23   | GO:0006739 | BP | NADP metabolic process (11)                                                         |
| 6   | 9   | 6   | 2.47e-04 | 13   | GO:0006740 | BP | NADPH regeneration (12)                                                             |
| 6   | 11  | 4   | 2.99e-03 | 24   | GO:0019674 | BP | NAD metabolic process (11)                                                          |
| 77  | 126 | 118 | 6.41e-24 | 748  | GO:0006163 | BP | purine nucleotide metabolic process (9)                                             |
| 70  | 114 | 104 | 4.75e-28 | 540  | GO:0009150 | BP | purine ribonucleotide metabolic process (10)                                        |
| 62  | 106 | 99  | 3.30e-26 | 519  | GO:0009144 | BP | purine nucleoside triphosphate metabolic process (10)                               |
| 62  | 104 | 99  | 1.72e-26 | 515  | GO:0009205 | BP | purine ribonucleoside triphosphate metabolic process (11)                           |
| 35  | 59  | 64  | 3.05e-13 | 380  | GO:0046039 | BP | GTP metabolic process (12)                                                          |
| 27  | 45  | 35  | 1.28e-12 | 137  | GO:0046034 | BP | ATP metabolic process (12)                                                          |
| 28  | 45  | 37  | 1.99e-03 | 293  | GO:0009165 | BP | nucleotide biosynthetic process (9)                                                 |
| 15  | 28  | 21  | 2.82e-06 | 92   | GO:0009260 | BP | ribonucleotide biosynthetic process (10)                                            |
| 8   | 18  | 14  | 1.37e-02 | 66   | GO:0009142 | BP | nucleoside triphosphate biosynthetic process (10)                                   |



|     |     |     |          |      |            |    |                                                              |
|-----|-----|-----|----------|------|------------|----|--------------------------------------------------------------|
| 8   | 18  | 14  | 1.37e-02 | 66   | GO:0009142 | BP | nucleoside triphosphate biosynthetic process (10)            |
| 8   | 17  | 14  | 1.14e-02 | 64   | GO:0009201 | BP | ribonucleoside triphosphate biosynthetic process (11)        |
| 20  | 32  | 30  | 4.54e-02 | 247  | GO:0006164 | BP | purine nucleotide biosynthetic process (10)                  |
| 8   | 17  | 13  | 3.58e-02 | 64   | GO:0009145 | BP | purine nucleoside triphosphate biosynthetic process (11)     |
| 15  | 26  | 18  | 7.25e-06 | 84   | GO:0009152 | BP | purine ribonucleotide biosynthetic process (11)              |
| 8   | 16  | 13  | 4.83e-02 | 63   | GO:0009206 | BP | purine ribonucleoside triphosphate biosynthetic process (12) |
| 8   | 15  | 12  | 2.43e-02 | 51   | GO:0006754 | BP | ATP biosynthetic process (13)                                |
| 64  | 102 | 100 | 4.95e-26 | 531  | GO:0009166 | BP | nucleotide catabolic process (9)                             |
| 60  | 95  | 91  | 1.65e-24 | 468  | GO:0009261 | BP | ribonucleotide catabolic process (10)                        |
| 59  | 95  | 90  | 5.53e-24 | 466  | GO:0009143 | BP | nucleoside triphosphate catabolic process (10)               |
| 58  | 93  | 89  | 1.13e-23 | 461  | GO:0009203 | BP | ribonucleoside triphosphate catabolic process (11)           |
| 63  | 99  | 98  | 4.88e-26 | 512  | GO:0006195 | BP | purine nucleotide catabolic process (10)                     |
| 60  | 94  | 91  | 1.18e-24 | 466  | GO:0009154 | BP | purine ribonucleotide catabolic process (11)                 |
| 58  | 94  | 89  | 1.33e-23 | 462  | GO:0009146 | BP | purine nucleoside triphosphate catabolic process (11)        |
| 58  | 93  | 89  | 1.13e-23 | 461  | GO:0009207 | BP | purine ribonucleoside triphosphate catabolic process (12)    |
| 23  | 35  | 25  | 2.91e-11 | 94   | GO:0006200 | BP | ATP catabolic process (13)                                   |
| 35  | 58  | 64  | 6.81e-14 | 369  | GO:0006184 | BP | GTP catabolic process (13)                                   |
| 88  | 139 | 110 | 2.87e-29 | 908  | GO:0042180 | BP | cellular ketone metabolic process (4)                        |
| 87  | 138 | 112 | 1.41e-29 | 896  | GO:0006082 | BP | organic acid metabolic process (4)                           |
| 87  | 137 | 109 | 9.76e-30 | 879  | GO:0043436 | BP | oxoacid metabolic process (5)                                |
| 87  | 137 | 109 | 9.76e-30 | 879  | GO:0019752 | BP | carboxylic acid metabolic process (6)                        |
| 8   | 19  | 6   | 9.31e-06 | 48   | GO:0043648 | BP | dicarboxylic acid metabolic process (7)                      |
| 4   | 7   | 2   | 1.59e-02 | 11   | GO:0006107 | BP | oxaloacetate metabolic process (8)                           |
| 53  | 126 | 78  | 8.42e-30 | 463  | GO:0006520 | BP | cellular amino acid metabolic process (7)                    |
| 7   | 25  | 12  | 3.25e-08 | 63   | GO:0043038 | BP | amino acid activation (8)                                    |
| 7   | 25  | 12  | 3.25e-08 | 63   | GO:0043039 | BP | tRNA aminoacylation (9)                                      |
| 7   | 25  | 12  | 5.64e-09 | 59   | GO:0006418 | BP | tRNA aminoacylation for protein translation (10)             |
| 10  | 18  | 9   | 6.61e-03 | 63   | GO:0009064 | BP | glutamine family amino acid metabolic process (8)            |
| 19  | 39  | 8   | 2.01e-04 | 185  | GO:0016054 | BP | organic acid catabolic process (5)                           |
| 19  | 39  | 8   | 2.01e-04 | 185  | GO:0046395 | BP | carboxylic acid catabolic process (6)                        |
| 11  | 26  | 6   | 4.78e-03 | 113  | GO:0009063 | BP | cellular amino acid catabolic process (7)                    |
| 31  | 45  | 22  | 3.43e-02 | 275  | GO:0016053 | BP | organic acid biosynthetic process (5)                        |
| 31  | 45  | 22  | 3.43e-02 | 275  | GO:0046394 | BP | carboxylic acid biosynthetic process (6)                     |
| 14  | 22  | 9   | 2.99e-02 | 96   | GO:0008652 | BP | cellular amino acid biosynthetic process (7)                 |
| 44  | 98  | 58  | 6.04e-08 | 578  | GO:0044262 | BP | cellular carbohydrate metabolic process (4)                  |
| 20  | 40  | 23  | 6.60e-09 | 139  | GO:0044275 | BP | cellular carbohydrate catabolic process (5)                  |
| 20  | 37  | 22  | 5.08e-07 | 139  | GO:0034637 | BP | cellular carbohydrate biosynthetic process (5)               |
| 29  | 66  | 39  | 9.62e-09 | 314  | GO:0005996 | BP | monosaccharide metabolic process (5)                         |
| 18  | 33  | 18  | 1.12e-08 | 101  | GO:0046365 | BP | monosaccharide catabolic process (6)                         |
| 17  | 25  | 18  | 2.04e-05 | 82   | GO:0046364 | BP | monosaccharide biosynthetic process (6)                      |
| 29  | 62  | 35  | 4.34e-10 | 267  | GO:0019318 | BP | hexose metabolic process (6)                                 |
| 18  | 31  | 17  | 9.31e-08 | 97   | GO:0019320 | BP | hexose catabolic process (7)                                 |
| 26  | 59  | 28  | 3.41e-12 | 223  | GO:0006006 | BP | glucose metabolic process (7)                                |
| 17  | 29  | 16  | 1.64e-08 | 81   | GO:0006007 | BP | glucose catabolic process (8)                                |
| 13  | 22  | 13  | 4.62e-05 | 68   | GO:0006096 | BP | glycolysis (9)                                               |
| 6   | 8   | 5   | 2.02e-03 | 12   | GO:0006098 | BP | pentose-phosphate shunt (9)                                  |
| 13  | 19  | 12  | 8.25e-03 | 70   | GO:0019319 | BP | hexose biosynthetic process (7)                              |
| 12  | 18  | 12  | 3.95e-03 | 61   | GO:0006094 | BP | gluconeogenesis (8)                                          |
| 186 | 253 | 185 | 1.06e-16 | 1829 | GO:0008219 | BP | cell death (3)                                               |
| 175 | 234 | 172 | 9.85e-15 | 1669 | GO:0012501 | BP | programmed cell death (4)                                    |
| 173 | 231 | 168 | 1.20e-13 | 1656 | GO:0006915 | BP | apoptotic process (5)                                        |
| 29  | 25  | 12  | 5.10e-13 | 77   | GO:0006921 | BP | cellular component disassembly involved in apoptosis (6)     |
| 72  | 126 | 103 | 6.38e-21 | 645  | GO:0016044 | BP | cellular membrane organization (3)                           |
| 42  | 51  | 48  | 3.59e-06 | 351  | GO:0010324 | BP | membrane invagination (4)                                    |
| 10  | 23  | 22  | 7.31e-08 | 76   | GO:0006944 | BP | cellular membrane fusion (4)                                 |
| 2   | 12  | 3   | 1.29e-02 | 32   | GO:0007006 | BP | mitochondrial membrane organization (4)                      |
| 45  | 62  | 70  | 2.65e-05 | 649  | GO:0019725 | BP | cellular homeostasis (3)                                     |
| 60  | 92  | 41  | 1.76e-37 | 177  | GO:0006413 | BP | translational initiation (3)                                 |
| 98  | 155 | 85  | 2.24e-43 | 515  | GO:0016032 | BP | viral reproduction (2)                                       |

|           |          |      |    |            |    |                                                                    |
|-----------|----------|------|----|------------|----|--------------------------------------------------------------------|
| 36343571  | 3.90e-04 | 5609 | BP | G0:0032501 | BP | multicellular organismal process (2)                               |
| 54 55 82  | 2.29e-15 | 528  | BP | G0:0050817 | BP | coagulation (3)                                                    |
| 60 60 87  | 1.42e-13 | 621  | BP | G0:0050878 | BP | regulation of body fluid levels (3)                                |
| 56 56 82  | 2.29e-15 | 528  | BP | G0:0007599 | BP | hemostasis (4)                                                     |
| 53 54 80  | 1.75e-14 | 524  | BP | G0:0007596 | BP | blood coagulation (5)                                              |
| 31 23 44  | 6.14e-11 | 223  | BP | G0:0030168 | BP | platelet activation (6)                                            |
| 299380500 | 1.29e-03 | 4421 | BP | G0:0032502 | BP | developmental process (2)                                          |
| 265323267 | 3.74e-04 | 3799 | BP | G0:0048856 | BP | anatomical structure development (3)                               |
| 236283235 | 3.43e-03 | 3352 | BP | G0:0048731 | BP | system development (4)                                             |
| 143161155 | 8.34e-04 | 1984 | BP | G0:0009653 | BP | anatomical structure morphogenesis (3)                             |
| 386568455 | 1.11e-53 | 4383 | BP | G0:0051179 | BP | localization (2)                                                   |
| 244574265 | 3.40e-59 | 1818 | BP | G0:0033036 | BP | macromolecule localization (3)                                     |
| 209322245 | 4.89e-55 | 1555 | BP | G0:0008104 | BP | protein localization (4)                                           |
| 35 45 7   | 4.33e-12 | 141  | BP | G0:0006403 | BP | RNA localization (4)                                               |
| 58 55 75  | 1.32e-02 | 838  | BP | G0:0051674 | BP | localization of cell (3)                                           |
| 58 55 75  | 1.32e-02 | 838  | BP | G0:0048870 | BP | cell motility (4)                                                  |
| 51 51 72  | 7.24e-03 | 781  | BP | G0:0016477 | BP | cell migration (5)                                                 |
| 15 17 32  | 3.98e-03 | 242  | BP | G0:0050900 | BP | leukocyte migration (6)                                            |
| 241573254 | 2.60e-55 | 1950 | BP | G0:0051641 | BP | cellular localization (3)                                          |
| 25 44 18  | 1.18e-10 | 147  | BP | G0:0051640 | BP | organelle localization (4)                                         |
| 10 28 13  | 1.04e-10 | 64   | BP | G0:0051648 | BP | vesicle localization (5)                                           |
| 138223134 | 6.45e-49 | 868  | BP | G0:0070727 | BP | cellular macromolecule localization (4)                            |
| 137213134 | 1.12e-48 | 864  | BP | G0:0034613 | BP | cellular protein localization (5)                                  |
| 89 135 68 | 1.92e-32 | 493  | BP | G0:0033365 | BP | protein localization to organelle (6)                              |
| 46 70 37  | 9.64e-39 | 125  | BP | G0:0070972 | BP | protein localization in endoplasmic reticulum (7)                  |
| 4 17 5    | 1.67e-05 | 40   | BP | G0:0070585 | BP | protein localization in mitochondrion (7)                          |
| 33 36 27  | 3.25e-02 | 247  | BP | G0:0034504 | BP | protein localization to nucleus (7)                                |
| 118137117 | 1.85e-09 | 1120 | BP | G0:0051704 | BP | multi-organism process (2)                                         |
| 73 81 64  | 1.04e-10 | 468  | BP | G0:0044419 | BP | interspecies interaction between organisms (3)                     |
| 333513134 | 2.88e-52 | 3671 | BP | G0:0051234 | BP | establishment of localization (2)                                  |
| 34 44 7   | 3.72e-12 | 135  | BP | G0:0051236 | BP | establishment of RNA localization (3)                              |
| 21 37 16  | 2.78e-11 | 104  | BP | G0:0051656 | BP | establishment of organelle localization (3)                        |
| 327513295 | 7.87e-52 | 3612 | BP | G0:0006810 | BP | transport (3)                                                      |
| 36 47 11  | 9.46e-12 | 155  | BP | G0:0015931 | BP | nucleobase-containing compound transport (4)                       |
| 34 44 7   | 3.72e-12 | 135  | BP | G0:0050657 | BP | nucleic acid transport (5)                                         |
| 34 44 7   | 3.72e-12 | 135  | BP | G0:0050658 | BP | RNA transport (6)                                                  |
| 1 5 1     | 9.04e-03 | 5    | BP | G0:0051029 | BP | rRNA transport (7)                                                 |
| 29 37 5   | 3.24e-09 | 119  | BP | G0:0051028 | BP | mRNA transport (7)                                                 |
| 10 22 20  | 1.26e-04 | 92   | BP | G0:0006818 | BP | hydrogen transport (4)                                             |
| 10 22 20  | 8.53e-05 | 90   | BP | G0:0015992 | BP | proton transport (5)                                               |
| 41 74 99  | 2.85e-06 | 1003 | BP | G0:0006811 | BP | ion transport (4)                                                  |
| 29 53 66  | 2.81e-02 | 725  | BP | G0:0006812 | BP | cation transport (5)                                               |
| 57 78 88  | 2.40e-08 | 777  | BP | G0:0046903 | BP | secretion (4)                                                      |
| 102166154 | 3.80e-35 | 926  | BP | G0:0016192 | BP | vesicle-mediated transport (4)                                     |
| 2 6 10    | 1.40e-03 | 27   | BP | G0:0048278 | BP | vesicle docking (5)                                                |
| 42 51 48  | 3.59e-06 | 351  | BP | G0:0006897 | BP | endocytosis (5)                                                    |
| 9 27 9    | 2.77e-19 | 35   | BP | G0:0006900 | BP | membrane budding (5)                                               |
| 9 26 9    | 6.51e-19 | 33   | BP | G0:0006901 | BP | vesicle coating (6)                                                |
| 6 11 9    | 4.93e-03 | 25   | BP | G0:0006906 | BP | vesicle fusion (5)                                                 |
| 51 88 92  | 4.24e-04 | 1006 | BP | G0:0055085 | BP | transmembrane transport (4)                                        |
| 18 31 41  | 1.40e-03 | 337  | BP | G0:0034220 | BP | ion transmembrane transport (5)                                    |
| 174287215 | 1.19e-52 | 1303 | BP | G0:0045184 | BP | establishment of protein localization (3)                          |
| 48 91 40  | 3.44e-42 | 195  | BP | G0:0072594 | BP | establishment of protein localization to organelle (4)             |
| 44 83 34  | 6.29e-41 | 115  | BP | G0:0072599 | BP | establishment of protein localization in endoplasmic reticulum (5) |
| 4 17 5    | 1.04e-05 | 39   | BP | G0:0072655 | BP | establishment of protein localization in mitochondrion (5)         |
| 173253215 | 5.19e-54 | 1270 | BP | G0:0015031 | BP | protein transport (4)                                              |
| 32 50 28  | 3.50e-04 | 272  | BP | G0:0017038 | BP | protein import (5)                                                 |
| 221355235 | 7.16e-56 | 1760 | BP | G0:0051649 | BP | establishment of localization in cell (3)                          |
| 10 54 10  | 5.28e-10 | 50   | BP | G0:0051650 | BP | establishment of vesicle localization (4)                          |



|     |     |     |          |      |            |    |                                                                 |
|-----|-----|-----|----------|------|------------|----|-----------------------------------------------------------------|
| 10  | 24  | 12  | 5.28e-10 | 50   | GO:0051650 | BP | establishment of vesicle localization (4)                       |
| 8   | 24  | 10  | 1.77e-14 | 36   | GO:0006903 | BP | vesicle targeting (5)                                           |
| 18  | 30  | 17  | 3.73e-74 | 1131 | GO:0046907 | BP | intracellular transport (4)                                     |
| 56  | 73  | 33  | 2.54e-09 | 356  | GO:0051169 | BP | nuclear transport (5)                                           |
| 56  | 73  | 33  | 1.64e-09 | 353  | GO:0006913 | BP | nucleocytoplasmic transport (6)                                 |
| 25  | 37  | 10  | 1.35e-09 | 116  | GO:0051168 | BP | nuclear export (7)                                              |
| 17  | 24  | 4   | 2.46e-05 | 77   | GO:0006405 | BP | RNA export from nucleus (8)                                     |
| 13  | 20  | 2   | 1.14e-03 | 68   | GO:0006406 | BP | mRNA export from nucleus (9)                                    |
| 9   | 37  | 12  | 1.74e-13 | 91   | GO:0006839 | BP | mitochondrial transport (5)                                     |
| 5   | 8   |     | 3.83e-02 | 16   | GO:0042776 | BP | mitochondrial ATP synthesis coupled proton transport (6)        |
| 16  | 30  | 29  | 6.94e-08 | 130  | GO:0016197 | BP | endosome transport (5)                                          |
| 24  | 61  | 41  | 5.11e-19 | 177  | GO:0048193 | BP | Golgi vesicle transport (5)                                     |
| 12  | 21  | 21  | 9.65e-08 | 70   | GO:0006892 | BP | post-Golgi vesicle-mediated transport (6)                       |
| 5   | 22  | 11  | 1.19e-07 | 52   | GO:0006888 | BP | ER to Golgi vesicle-mediated transport (6)                      |
| 1   | 10  | 4   | 2.92e-05 | 14   | GO:0090114 | BP | COPII-coated vesicle budding (7)                                |
| 6   | 13  | 6   | 2.70e-04 | 28   | GO:0006890 | BP | retrograde vesicle-mediated transport, Golgi to ER (6)          |
| 6   | 21  |     | 2.80e-15 | 26   | GO:0048199 | BP | vesicle targeting, to, from or within Golgi (6)                 |
| 1   | 10  | 4   | 2.92e-05 | 14   | GO:0048207 | BP | vesicle targeting, rough ER to cis-Golgi (7)                    |
| 1   | 10  | 4   | 2.92e-05 | 14   | GO:0048208 | BP | COPII vesicle coating (8)                                       |
| 5   | 14  |     | 2.09e-12 | 14   | GO:0048194 | BP | Golgi vesicle budding (6)                                       |
| 5   | 13  |     | 2.46e-11 | 13   | GO:0035964 | BP | COPI-coated vesicle budding (7)                                 |
| 5   | 13  | 5   | 2.46e-11 | 13   | GO:0048200 | BP | Golgi transport vesicle coating (7)                             |
| 5   | 13  | 5   | 2.46e-11 | 13   | GO:0048205 | BP | COPI coating of Golgi vesicle (8)                               |
| 124 | 130 | 116 | 6.45e-53 | 695  | GO:0006886 | BP | intracellular protein transport (5)                             |
| 89  | 147 | 77  | 6.63e-37 | 488  | GO:0006605 | BP | protein targeting (6)                                           |
| 46  | 30  | 36  | 2.81e-41 | 154  | GO:0006612 | BP | protein targeting to membrane (7)                               |
| 43  | 69  | 33  | 2.74e-41 | 114  | GO:0006613 | BP | cotranslational protein targeting to membrane (8)               |
| 10  | 15  | 8   | 2.70e-04 | 37   | GO:0006611 | BP | protein export from nucleus (7)                                 |
| 44  | 69  | 34  | 6.29e-41 | 115  | GO:0045047 | BP | protein targeting to ER (7)                                     |
| 43  | 69  | 33  | 4.99e-42 | 112  | GO:0006614 | BP | SRP-dependent cotranslational protein targeting to membrane (8) |
| 4   | 17  | 5   | 2.25e-06 | 36   | GO:0006626 | BP | protein targeting to mitochondrion (7)                          |
| 52  | 69  | 83  | 3.05e-09 | 686  | GO:0032940 | BP | secretion by cell (4)                                           |
| 27  | 44  | 53  | 4.35e-14 | 262  | GO:0006887 | BP | exocytosis (5)                                                  |
| 15  | 13  | 20  | 2.43e-05 | 84   | GO:0002576 | BP | platelet degranulation (6)                                      |
| 2   | 6   | 9   | 6.83e-03 | 25   | GO:0006904 | BP | vesicle docking involved in exocytosis (6)                      |
| 128 | 170 | 97  | 1.06e-04 | 1336 | GO:0022414 | BP | reproductive process (2)                                        |
| 84  | 115 | 45  | 1.44e-15 | 566  | GO:0048610 | BP | cellular process involved in reproduction (3)                   |
| 65  | 90  | 42  | 7.77e-24 | 301  | GO:0022415 | BP | viral reproductive process (3)                                  |
| 6   | 4   |     | 2.88e-03 | 8    | GO:0030069 | BP | lysogeny (4)                                                    |
| 64  | 86  |     | 1.04e-28 | 253  | GO:0019058 | BP | viral infectious cycle (4)                                      |
| 52  | 70  |     | 4.59e-28 | 168  | GO:0019080 | BP | viral genome expression (5)                                     |
| 52  | 70  |     | 4.59e-28 | 168  | GO:0019083 | BP | viral transcription (6)                                         |
| 6   | 4   |     | 2.88e-03 | 8    | GO:0019047 | BP | provirus integration (4)                                        |
| 645 | 795 | 559 | 1.40e-12 | 8570 | GO:0050789 | BP | regulation of biological process (2)                            |
| 282 | 351 | 257 | 4.83e-06 | 3463 | GO:0048518 | BP | positive regulation of biological process (3)                   |
| 42  | 39  | 41  | 1.73e-04 | 312  | GO:0044087 | BP | regulation of cellular component biogenesis (3)                 |
| 115 | 120 | 111 | 2.09e-04 | 1253 | GO:0032879 | BP | regulation of localization (3)                                  |
| 425 | 485 | 282 | 6.26e-14 | 4998 | GO:0019222 | BP | regulation of metabolic process (3)                             |
| 275 | 275 | 130 | 1.76e-04 | 3496 | GO:0009889 | BP | regulation of biosynthetic process (4)                          |
| 360 | 398 | 229 | 8.55e-11 | 4231 | GO:0060255 | BP | regulation of macromolecule metabolic process (4)               |
| 266 | 257 | 114 | 6.90e-05 | 3269 | GO:0010556 | BP | regulation of macromolecule biosynthetic process (5)            |
| 294 | 275 | 125 | 7.42e-09 | 3393 | GO:0010468 | BP | regulation of gene expression (5)                               |
| 58  | 67  | 35  | 4.01e-09 | 351  | GO:0010608 | BP | posttranscriptional regulation of gene expression (6)           |
| 364 | 410 | 235 | 8.99e-09 | 4430 | GO:0080090 | BP | regulation of primary metabolic process (4)                     |
| 132 | 180 | 147 | 4.30e-13 | 1389 | GO:0051246 | BP | regulation of protein metabolic process (5)                     |
| 148 | 184 | 126 | 2.06e-02 | 1749 | GO:0009893 | BP | positive regulation of metabolic process (4)                    |
| 135 | 164 | 108 | 3.24e-02 | 1579 | GO:0010604 | BP | positive regulation of macromolecule metabolic process (5)      |
| 52  | 82  | 77  | 1.11e-10 | 575  | GO:0051247 | BP | positive regulation of protein metabolic process (6)            |
| 299 | 313 | 153 | 5.38e-07 | 3594 | GO:0051171 | BP | regulation of nitrogen compound metabolic process (4)           |

|     |     |     |          |      |            |    |                                                                                    |
|-----|-----|-----|----------|------|------------|----|------------------------------------------------------------------------------------|
| 148 | 189 | 152 | 1.27e-10 | 1557 | GO:0050790 | BP | regulation of catalytic activity (4)                                               |
| 81  | 91  | 61  | 5.24e-03 | 798  | GO:0051336 | BP | regulation of hydrolase activity (5)                                               |
| 12  | 19  | 14  | 1.61e-02 | 73   | GO:0032069 | BP | regulation of nuclease activity (6)                                                |
| 36  | 30  | 24  | 2.50e-03 | 251  | GO:0052547 | BP | regulation of peptidase activity (6)                                               |
| 35  | 30  | 24  | 3.52e-03 | 244  | GO:0052548 | BP | regulation of endopeptidase activity (7)                                           |
| 30  | 24  | 16  | 2.51e-04 | 171  | GO:2000116 | BP | regulation of cysteine-type endopeptidase activity (8)                             |
| 29  | 21  | 16  | 4.48e-04 | 166  | GO:0043281 | BP | regulation of cysteine-type endopeptidase activity involved in apoptotic pr... (9) |
| 19  | 42  | 37  | 9.45e-17 | 112  | GO:0051340 | BP | regulation of ligase activity (5)                                                  |
| 57  | 72  | 78  | 1.42e-11 | 565  | GO:0043086 | BP | negative regulation of catalytic activity (5)                                      |
| 15  | 35  | 34  | 6.24e-18 | 87   | GO:0051352 | BP | negative regulation of ligase activity (6)                                         |
| 92  | 139 | 105 | 7.60e-09 | 982  | GO:0043085 | BP | positive regulation of catalytic activity (5)                                      |
| 16  | 41  | 36  | 3.33e-18 | 97   | GO:0051351 | BP | positive regulation of ligase activity (6)                                         |
| 613 | 758 | 526 | 9.17e-12 | 8106 | GO:0050794 | BP | regulation of cellular process (3)                                                 |
| 265 | 334 | 244 | 9.26e-07 | 3128 | GO:0048522 | BP | positive regulation of cellular process (4)                                        |
| 27  | 25  |     | 6.33e-03 | 168  | GO:0032970 | BP | regulation of actin filament-based process (4)                                     |
| 94  | 123 | 70  | 1.96e-09 | 751  | GO:0051726 | BP | regulation of cell cycle (4)                                                       |
| 66  | 90  | 55  | 8.26e-11 | 458  | GO:0010564 | BP | regulation of cell cycle process (5)                                               |
| 24  | 41  | 40  | 2.78e-12 | 172  | GO:0090068 | BP | positive regulation of cell cycle process (6)                                      |
| 45  | 62  | 45  | 2.34e-05 | 343  | GO:0007346 | BP | regulation of mitotic cell cycle (5)                                               |
| 29  | 44  | 38  | 5.63e-11 | 170  | GO:2000602 | BP | regulation of interphase of mitotic cell cycle (6)                                 |
| 20  | 39  | 38  | 2.18e-16 | 121  | GO:2000045 | BP | regulation of G1/S transition of mitotic cell cycle (7)                            |
| 22  | 15  | 7   | 3.43e-05 | 91   | GO:0032886 | BP | regulation of microtubule-based process (4)                                        |
| 100 | 119 | 112 | 4.14e-03 | 1362 | GO:0010646 | BP | regulation of cell communication (4)                                               |
| 141 | 189 | 141 | 4.57e-12 | 1346 | GO:0010941 | BP | regulation of cell death (4)                                                       |
| 139 | 186 | 137 | 2.00e-11 | 1316 | GO:0043067 | BP | regulation of programmed cell death (5)                                            |
| 139 | 186 | 136 | 2.49e-11 | 1306 | GO:0042981 | BP | regulation of apoptotic process (6)                                                |
| 373 | 432 | 246 | 3.46e-09 | 4535 | GO:0031323 | BP | regulation of cellular metabolic process (4)                                       |
| 20  | 54  | 38  | 8.68e-15 | 170  | GO:0010565 | BP | regulation of cellular ketone metabolic process (5)                                |
| 15  | 38  | 36  | 3.98e-20 | 87   | GO:0033238 | BP | regulation of cellular amine metabolic process (5)                                 |
| 13  | 36  | 33  | 5.14e-20 | 72   | GO:0006521 | BP | regulation of cellular amino acid metabolic process (6)                            |
| 273 | 270 | 127 | 9.08e-04 | 3469 | GO:0031326 | BP | regulation of cellular biosynthetic process (5)                                    |
| 262 | 252 | 109 | 5.49e-05 | 3202 | GO:2000112 | BP | regulation of cellular macromolecule biosynthetic process (6)                      |
| 283 | 276 | 117 | 2.78e-05 | 3489 | GO:0019219 | BP | regulation of nucleobase-containing compound metabolic process (5)                 |
| 25  | 42  | 29  | 1.03e-04 | 3047 | GO:0051252 | BP | regulation of RNA metabolic process (6)                                            |
| 232 | 209 | 88  | 1.98e-02 | 2979 | GO:2001141 | BP | regulation of RNA biosynthetic process (7)                                         |
| 23  | 104 | 88  | 1.89e-02 | 2962 | GO:0006355 | BP | regulation of transcription, DNA-dependent (8)                                     |
| 14  | 9   | 3   | 4.41e-05 | 38   | GO:0043487 | BP | regulation of RNA stability (7)                                                    |
| 11  | 7   | 2   | 2.85e-04 | 26   | GO:0043489 | BP | RNA stabilization (8)                                                              |
| 14  | 9   | 3   | 1.94e-05 | 36   | GO:0043488 | BP | regulation of mRNA stability (8)                                                   |
| 11  | 7   | 2   | 2.85e-04 | 26   | GO:0048255 | BP | mRNA stabilization (9)                                                             |
| 5   | 1   |     | 1.91e-03 | 5    | GO:0070934 | BP | CRD-mediated mRNA stabilization (10)                                               |
| 124 | 170 | 135 | 8.59e-13 | 1239 | GO:0032268 | BP | regulation of cellular protein metabolic process (5)                               |
| 86  | 127 | 113 | 1.28e-11 | 991  | GO:0031399 | BP | regulation of protein modification process (6)                                     |
| 29  | 50  | 42  | 3.06e-13 | 178  | GO:0031396 | BP | regulation of protein ubiquitination (7)                                           |
| 19  | 41  | 37  | 2.27e-17 | 108  | GO:0051438 | BP | regulation of ubiquitin-protein ligase activity (8)                                |
| 16  | 39  | 34  | 5.18e-17 | 92   | GO:0051439 | BP | regulation of ubiquitin-protein ligase activity involved in mitotic cell cy... (9) |
| 35  | 43  | 21  | 4.54e-05 | 205  | GO:0006417 | BP | regulation of translation (6)                                                      |
| 12  | 18  | 7   | 3.03e-03 | 60   | GO:0006446 | BP | regulation of translational initiation (7)                                         |
| 291 | 383 | 344 | 5.00e-14 | 4333 | GO:0007165 | BP | signal transduction (4)                                                            |
| 14  | 8   | 4   | 9.59e-03 | 56   | GO:0097190 | BP | apoptotic signaling pathway (5)                                                    |
| 12  | 26  | 15  | 2.44e-04 | 98   | GO:0006984 | BP | ER-nucleus signaling pathway (5)                                                   |
| 12  | 23  | 14  | 6.96e-04 | 84   | GO:0030968 | BP | endoplasmic reticulum unfolded protein response (6)                                |
| 153 | 211 | 183 | 1.39e-11 | 1959 | GO:0035556 | BP | intracellular signal transduction (5)                                              |
| 20  | 46  | 40  | 1.89e-15 | 142  | GO:0072331 | BP | signal transduction by p53 class mediator (6)                                      |
| 8   | 6   | 2   | 2.67e-02 | 20   | GO:0097193 | BP | intrinsic apoptotic signaling pathway (6)                                          |
| 56  | 82  | 81  | 4.96e-11 | 613  | GO:0007264 | BP | small GTPase mediated signal transduction (6)                                      |
| 25  | 49  | 42  | 4.54e-15 | 160  | GO:0042770 | BP | signal transduction in response to DNA damage (6)                                  |
| 20  | 45  | 40  | 4.54e-16 | 137  | GO:0030330 | BP | DNA damage response, signal transduction by p53 class mediator (7)                 |
| 10  | 11  | 11  | 6.80e-05 | 100  | GO:0066007 | BP | regulation of cell cycle process (4)                                               |

|     |     |     |          |      |    |                                                                                     |
|-----|-----|-----|----------|------|----|-------------------------------------------------------------------------------------|
| 19  | 24  | 31  | 6.30e-05 | 192  | BP | regulation of vesicle-mediated transport (4)                                        |
| 139 | 163 | 144 | 8.80e-03 | 1888 | BP | regulation of signaling (3)                                                         |
| 122 | 126 | 114 | 1.25e-07 | 1153 | BP | regulation of cellular component organization (3)                                   |
| 67  | 65  | 46  | 1.45e-08 | 453  | BP | regulation of organelle organization (4)                                            |
| 44  | 41  | 35  | 3.24e-07 | 252  | BP | regulation of cytoskeleton organization (5)                                         |
| 20  | 13  | 7   | 5.31e-05 | 78   | BP | regulation of microtubule cytoskeleton organization (6)                             |
| 25  | 25  |     | 3.80e-02 | 164  | BP | regulation of actin cytoskeleton organization (6)                                   |
| 45  | 48  | 45  | 2.04e-02 | 427  | BP | positive regulation of cellular component organization (4)                          |
| 19  | 15  | 10  | 4.34e-05 | 70   | BP | regulation of protein complex disassembly (4)                                       |
| 33  | 29  | 26  | 1.05e-05 | 176  | BP | regulation of protein complex assembly (4)                                          |
| 22  | 20  |     | 1.76e-04 | 99   | BP | regulation of protein polymerization (5)                                            |
| 292 | 365 | 238 | 1.97e-13 | 3101 | BP | negative regulation of biological process (2)                                       |
| 46  | 36  | 34  | 1.22e-05 | 302  | BP | negative regulation of cellular component organization (3)                          |
| 17  | 10  | 7   | 1.81e-06 | 47   | BP | negative regulation of protein complex disassembly (4)                              |
| 16  | 14  | 13  | 9.70e-04 | 61   | BP | negative regulation of protein complex assembly (4)                                 |
| 137 | 164 | 95  | 7.55e-07 | 1341 | BP | negative regulation of metabolic process (3)                                        |
| 88  | 81  | 35  | 1.92e-02 | 918  | BP | negative regulation of nitrogen compound metabolic process (4)                      |
| 123 | 151 | 87  | 1.85e-07 | 1212 | BP | negative regulation of macromolecule metabolic process (4)                          |
| 85  | 80  | 33  | 3.30e-02 | 891  | BP | negative regulation of macromolecule biosynthetic process (5)                       |
| 84  | 79  | 30  | 1.75e-02 | 863  | BP | negative regulation of cellular macromolecule biosynthetic process (6)              |
| 44  | 63  | 60  | 5.94e-14 | 329  | BP | negative regulation of protein metabolic process (5)                                |
| 28  | 34  | 22  | 4.39e-16 | 2822 | BP | negative regulation of cellular process (3)                                         |
| 33  | 23  | 17  | 4.03e-07 | 156  | BP | negative regulation of organelle organization (4)                                   |
| 22  | 17  | 14  | 1.46e-06 | 78   | BP | negative regulation of cytoskeleton organization (5)                                |
| 10  | 6   | 2   | 4.72e-03 | 27   | BP | negative regulation of microtubule polymerization or depolymerization (6)           |
| 13  | 11  |     | 2.02e-03 | 43   | BP | negative regulation of protein polymerization (4)                                   |
| 63  | 94  | 48  | 8.14e-12 | 471  | BP | negative regulation of cell cycle (4)                                               |
| 54  | 91  | 46  | 1.83e-14 | 409  | BP | cell cycle arrest (5)                                                               |
| 43  | 71  | 41  | 7.27e-13 | 293  | BP | regulation of cell cycle arrest (6)                                                 |
| 40  | 67  | 39  | 1.71e-12 | 271  | BP | cell cycle checkpoint (6)                                                           |
| 19  | 38  | 36  | 1.06e-16 | 106  | BP | G1/S transition checkpoint (7)                                                      |
| 20  | 44  | 35  | 1.17e-09 | 160  | BP | DNA integrity checkpoint (7)                                                        |
| 19  | 44  | 35  | 2.86e-10 | 153  | BP | DNA damage checkpoint (8)                                                           |
| 17  | 35  | 34  | 1.01e-18 | 83   | BP | signal transduction involved in cell cycle checkpoint (7)                           |
| 17  | 35  | 34  | 6.26e-19 | 82   | BP | signal transduction involved in DNA integrity checkpoint (8)                        |
| 17  | 35  | 34  | 6.26e-19 | 82   | BP | signal transduction involved in DNA damage checkpoint (9)                           |
| 17  | 35  | 34  | 6.26e-19 | 82   | BP | signal transduction involved in G1/S transition checkpoint (8)                      |
| 26  | 45  | 36  | 1.79e-10 | 159  | BP | mitotic cell cycle checkpoint (7)                                                   |
| 17  | 35  | 34  | 3.85e-19 | 81   | BP | signal transduction involved in mitotic cell cycle checkpoint (8)                   |
| 19  | 38  | 36  | 2.40e-17 | 102  | BP | mitotic cell cycle G1/S transition checkpoint (8)                                   |
| 17  | 35  | 34  | 3.85e-19 | 81   | BP | signal transduction involved in mitotic cell cycle G1/S checkpoint (9)              |
| 17  | 36  | 34  | 1.48e-17 | 89   | BP | mitotic cell cycle G1/S transition DNA damage checkpoint (9)                        |
| 17  | 35  | 34  | 3.85e-19 | 81   | BP | signal transduction involved in mitotic cell cycle G1/S transition DNA dama... (10) |
| 17  | 36  | 35  | 1.61e-17 | 95   | BP | positive regulation of cell cycle arrest (6)                                        |
| 17  | 35  | 34  | 3.85e-19 | 81   | BP | DNA damage response, signal transduction by p53 class mediator resulting in... (7)  |
| 71  | 93  | 59  | 1.60e-03 | 657  | BP | negative regulation of cell death (4)                                               |
| 69  | 88  | 54  | 2.86e-03 | 635  | BP | negative regulation of programmed cell death (5)                                    |
| 69  | 87  | 53  | 2.03e-03 | 629  | BP | negative regulation of apoptotic process (6)                                        |
| 13  | 144 | 92  | 2.11e-07 | 1227 | BP | negative regulation of cellular metabolic process (4)                               |
| 88  | 80  | 33  | 1.36e-02 | 910  | BP | negative regulation of nucleobase-containing compound metabolic process (5)         |
| 81  | 67  | 28  | 5.50e-03 | 799  | BP | negative regulation of RNA metabolic process (6)                                    |
| 7   | 5   |     | 2.86e-02 | 15   | BP | negative regulation of RNA splicing (7)                                             |
| 43  | 62  | 57  | 8.97e-15 | 289  | BP | negative regulation of cellular protein metabolic process (5)                       |
| 29  | 48  | 49  | 1.45e-17 | 190  | BP | negative regulation of protein modification process (6)                             |
| 22  | 38  |     | 4.46e-12 | 104  | BP | negative regulation of protein ubiquitination (7)                                   |
| 15  | 35  | 34  | 6.24e-18 | 87   | BP | negative regulation of ubiquitin-protein ligase activity (8)                        |
| 15  | 35  | 33  | 5.05e-18 | 81   | BP | negative regulation of ubiquitin-protein ligase activity involved in mitoti... (9)  |
| 14  | 30  | 2   | 7.49e-03 | 144  | BP | lipid modification (1)                                                              |
| 10  | 23  | 2   | 1.38e-03 | 87   | BP | lipid oxidation (2)                                                                 |

|    |    |    |          |      |            |    |                                                                                    |
|----|----|----|----------|------|------------|----|------------------------------------------------------------------------------------|
| 7  | 12 | 7  | 8.76e-03 | 31   | GO:0009161 | BP | ribonucleoside monophosphate metabolic process (1)                                 |
| 7  | 11 | 6  | 1.23e-02 | 27   | GO:0009156 | BP | ribonucleoside monophosphate biosynthetic process (2)                              |
| 7  | 11 | 5  | 2.99e-03 | 24   | GO:0009126 | BP | purine nucleoside monophosphate metabolic process (1)                              |
| 7  | 11 | 5  | 2.99e-03 | 24   | GO:0009167 | BP | purine ribonucleoside monophosphate metabolic process (2)                          |
| 7  | 10 | 4  | 3.34e-03 | 20   | GO:0009127 | BP | purine nucleoside monophosphate biosynthetic process (2)                           |
| 7  | 10 | 4  | 3.34e-03 | 20   | GO:0009168 | BP | purine ribonucleoside monophosphate biosynthetic process (3)                       |
| 82 | 94 | 93 | 8.36e-06 | 940  | GO:0032989 | BP | cellular component morphogenesis (1)                                               |
| 80 | 89 | 88 | 2.73e-05 | 893  | GO:0000902 | BP | cell morphogenesis (2)                                                             |
| 61 | 70 | 67 | 3.70e-04 | 653  | GO:0032990 | BP | cell part morphogenesis (2)                                                        |
| 61 | 67 | 66 | 4.79e-04 | 644  | GO:0048858 | BP | cell projection morphogenesis (3)                                                  |
| 59 | 62 | 62 | 3.93e-02 | 675  | GO:0048585 | BP | negative regulation of response to stimulus (1)                                    |
| 14 | 18 | 10 | 8.47e-03 | 64   | GO:0009112 | BP | nucleobase metabolic process (1)                                                   |
| 9  | 13 | 9  | 1.74e-02 | 38   | GO:0006144 | BP | purine base metabolic process (2)                                                  |
| 34 | 50 | 57 | 2.43e-02 | 594  | GO:0050801 | BP | ion homeostasis (1)                                                                |
| 20 | 34 | 46 | 3.92e-03 | 414  | GO:0055080 | BP | cation homeostasis (2)                                                             |
| 7  | 18 | 20 | 4.62e-05 | 87   | GO:0055072 | BP | iron ion homeostasis (3)                                                           |
| 16 | 29 | 40 | 6.98e-03 | 346  | GO:0055065 | BP | metal ion homeostasis (3)                                                          |
| 36 | 47 | 59 | 1.22e-03 | 566  | GO:0055082 | BP | cellular chemical homeostasis (1)                                                  |
| 32 | 46 | 55 | 4.28e-03 | 534  | GO:0006873 | BP | cellular ion homeostasis (2)                                                       |
| 18 | 30 | 44 | 3.79e-04 | 357  | GO:0030003 | BP | cellular cation homeostasis (3)                                                    |
| 15 | 27 | 38 | 6.00e-03 | 319  | GO:0006875 | BP | cellular metal ion homeostasis (4)                                                 |
| 6  | 16 | 20 | 2.21e-06 | 74   | GO:0006879 | BP | cellular iron ion homeostasis (5)                                                  |
| 97 | 95 | 95 | 1.55e-03 | 1080 | GO:0022008 | BP | neurogenesis (1)                                                                   |
| 90 | 91 | 92 | 8.21e-04 | 1021 | GO:0048699 | BP | generation of neurons (2)                                                          |
| 78 | 86 | 87 | 8.01e-04 | 948  | GO:0030182 | BP | neuron differentiation (3)                                                         |
| 67 | 86 | 84 | 4.25e-05 | 846  | GO:0007167 | BP | enzyme linked receptor protein signaling pathway (1)                               |
| 54 | 77 | 72 | 8.13e-07 | 623  | GO:0007169 | BP | transmembrane receptor protein tyrosine kinase signaling pathway (2)               |
| 25 | 27 | 21 | 4.22e-02 | 165  | GO:0007173 | BP | epidermal growth factor receptor signaling pathway (3)                             |
| 16 | 39 |    | 1.75e-05 | 170  | GO:0008286 | BP | insulin receptor signaling pathway (3)                                             |
| 20 | 16 | 9  | 4.89e-02 | 117  | GO:0010952 | BP | positive regulation of peptidase activity (1)                                      |
| 11 | 19 | 13 | 4.02e-03 | 67   | GO:0032075 | BP | positive regulation of nuclease activity (1)                                       |
| 10 | 17 | 12 | 4.46e-02 | 65   | GO:0006987 | BP | activation of signaling protein activity involved in unfolded protein respo... (2) |
| 65 | 70 | 70 | 6.67e-05 | 664  | GO:0000904 | BP | cell morphogenesis involved in differentiation (1)                                 |
| 4  | 2  | 3  | 3.20e-02 | 4    | GO:0046796 | BP | viral genome transport in host cell (1)                                            |
| 62 | 78 | 76 | 1.13e-02 | 849  | GO:0042325 | BP | regulation of phosphorylation (1)                                                  |
| 60 | 75 | 73 | 8.15e-03 | 798  | GO:0001932 | BP | regulation of protein phosphorylation (2)                                          |
| 73 | 78 | 82 | 2.12e-06 | 767  | GO:0048666 | BP | neuron development (1)                                                             |
| 67 | 73 | 77 | 3.34e-07 | 674  | GO:0031175 | BP | neuron projection development (2)                                                  |
| 58 | 63 | 63 | 3.00e-05 | 560  | GO:0048812 | BP | neuron projection morphogenesis (3)                                                |
| 60 | 60 | 64 | 8.72e-06 | 555  | GO:0048667 | BP | cell morphogenesis involved in neuron differentiation (2)                          |
| 54 | 53 | 55 | 1.15e-03 | 512  | GO:0007409 | BP | axonogenesis (3)                                                                   |
| 44 | 38 | 44 | 3.23e-04 | 355  | GO:0007411 | BP | axon guidance (4)                                                                  |
| 8  | 21 | 8  | 1.33e-04 | 66   | GO:0009267 | BP | cellular response to starvation (1)                                                |
| 5  | 16 | 4  | 1.45e-08 | 25   | GO:0016236 | BP | macroautophagy (2)                                                                 |
| 2  | 13 | 2  | 1.40e-07 | 18   | GO:0000045 | BP | autophagic vacuole assembly (3)                                                    |
| 3  | 12 | 1  | 5.82e-03 | 30   | GO:0010506 | BP | regulation of autophagy (1)                                                        |
| 20 | 21 | 22 | 4.32e-02 | 153  | GO:0042176 | BP | regulation of protein catabolic process (1)                                        |
| 10 | 23 | 2  | 6.96e-04 | 84   | GO:0019395 | BP | fatty acid oxidation (1)                                                           |
| 5  | 13 |    | 8.71e-03 | 36   | GO:0046320 | BP | regulation of fatty acid oxidation (2)                                             |
| 17 | 18 |    | 4.58e-02 | 89   | GO:0030832 | BP | regulation of actin filament length (1)                                            |
| 17 | 18 |    | 3.93e-02 | 88   | GO:0008064 | BP | regulation of actin polymerization or depolymerization (2)                         |
| 1  | 7  |    | 1.59e-02 | 11   | GO:0010508 | BP | positive regulation of autophagy (1)                                               |
| 10 | 8  |    | 1.99e-02 | 31   | GO:0030042 | BP | actin filament depolymerization (1)                                                |
| 10 | 8  |    | 1.43e-02 | 30   | GO:0030834 | BP | regulation of actin filament depolymerization (2)                                  |
| 10 | 7  |    | 3.14e-03 | 26   | GO:0030835 | BP | negative regulation of actin filament depolymerization (2)                         |
| 9  | 6  | 7  | 1.39e-02 | 24   | GO:0051693 | BP | actin filament capping (3)                                                         |
| 47 | 77 | 73 | 5.20e-12 | 499  | GO:0032270 | BP | positive regulation of cellular protein metabolic process (1)                      |
| 36 | 67 | 63 | 5.17e-11 | 411  | GO:0031401 | BP | positive regulation of protein modification process (2)                            |

|    |    |    |          |     |  |            |    |                                                                                    |
|----|----|----|----------|-----|--|------------|----|------------------------------------------------------------------------------------|
| 19 | 45 | 38 | 8.29e-15 | 133 |  | GO:0031398 | BP | positive regulation of protein ubiquitination (3)                                  |
| 16 | 49 | 36 | 6.15e-19 | 93  |  | GO:0051443 | BP | positive regulation of ubiquitin-protein ligase activity (4)                       |
| 13 | 38 | 34 | 4.00e-18 | 86  |  | GO:0051437 | BP | positive regulation of ubiquitin-protein ligase activity involved in mitoti... (5) |
| 9  | 15 | 12 | 1.32e-03 | 41  |  | GO:0042059 | BP | negative regulation of epidermal growth factor receptor signaling pathway (1)      |
| 16 | 16 |    | 3.14e-02 | 78  |  | GO:0030833 | BP | regulation of actin filament polymerization (1)                                    |
| 6  | 4  | 1  | 4.06e-02 | 11  |  | GO:0048025 | BP | negative regulation of nuclear mRNA splicing, via spliceosome (1)                  |
| 20 | 19 |    | 7.73e-03 | 104 |  | GO:0030518 | BP | intracellular steroid hormone receptor signaling pathway (1)                       |
| 5  | 7  |    | 6.24e-03 | 10  |  | GO:0031958 | BP | corticosteroid receptor signaling pathway (2)                                      |
| 5  | 7  |    | 2.02e-03 | 9   |  | GO:0042921 | BP | glucocorticoid receptor signaling pathway (3)                                      |

|     |     |     | P-value   | T     |  | term ID    | term domain and name                                |
|-----|-----|-----|-----------|-------|--|------------|-----------------------------------------------------|
| 9   | 10  | 28  | 4.20e-03  | 197   |  | GO:0045121 | CC membrane raft (1)                                |
| 109 | 153 | 995 | 9.91e-10  | 17930 |  | GO:0005575 | CC cellular_component (1)                           |
| 48  | 17  | 351 | 2.14e-101 | 4046  |  | GO:0032991 | CC macromolecular complex (2)                       |
| 27  | 14  | 2   | 2.29e-04  | 143   |  | GO:0032993 | CC protein-DNA complex (3)                          |
| 34  | 15  | 303 | 2.06e-47  | 3353  |  | GO:0043234 | CC protein complex (3)                              |
| 27  | 15  | 158 | 9.83e-69  | 2750  |  | GO:0031974 | CC membrane-enclosed lumen (2)                      |
| 109 | 153 | 981 | 6.81e-42  | 16623 |  | GO:0005623 | CC cell (2)                                         |
| 93  | 134 | 731 | 3.37e-121 | 10938 |  | GO:0043226 | CC organelle (2)                                    |
| 40  | 45  | 241 | 2.32e-53  | 3164  |  | GO:0043228 | CC non-membrane-bounded organelle (3)               |
| 94  | 123 | 635 | 1.65e-102 | 9866  |  | GO:0043227 | CC membrane-bounded organelle (3)                   |
| 99  | 151 | 163 | 1.62e-41  | 975   |  | GO:0031982 | CC vesicle (3)                                      |
| 95  | 138 | 152 | 2.47e-35  | 902   |  | GO:0031988 | CC membrane-bounded vesicle (4)                     |
| 109 | 153 | 981 | 6.30e-42  | 16622 |  | GO:0044464 | CC cell part (2)                                    |
| 11  | 7   | 11  | 6.39e-03  | 38    |  | GO:0032153 | CC cell division site (3)                           |
| 103 | 134 | 63  | 2.10e-35  | 851   |  | GO:0031975 | CC envelope (3)                                     |
| 11  | 7   | 11  | 6.39e-03  | 38    |  | GO:0032155 | CC cell division site part (3)                      |
| 11  | 7   |     | 1.27e-02  | 36    |  | GO:0032154 | CC cleavage furrow (4)                              |
| 127 | 121 | 147 | 3.17e-04  | 1828  |  | GO:0012505 | CC endomembrane system (3)                          |
| 378 | 245 | 566 | 6.09e-14  | 8233  |  | GO:0016020 | CC membrane (3)                                     |
| 12  | 27  |     | 1.66e-08  | 71    |  | GO:0048475 | CC coated membrane (4)                              |
| 13  | 36  | 14  | 1.62e-06  | 138   |  | GO:0019867 | CC outer membrane (4)                               |
| 14  | 23  |     | 3.93e-05  | 73    |  | GO:0030496 | CC midbody (3)                                      |
| 98  | 118 | 113 | 3.78e-07  | 1160  |  | GO:0042995 | CC cell projection (3)                              |
| 52  | 51  | 57  | 2.56e-02  | 595   |  | GO:0044463 | CC cell projection part (4)                         |
| 106 | 157 | 672 | 6.95e-166 | 12958 |  | GO:0005622 | CC intracellular (3)                                |
| 38  | 38  | 41  | 6.08e-08  | 240   |  | GO:0031252 | CC cell leading edge (3)                            |
| 21  | 22  | 25  | 4.14e-06  | 117   |  | GO:0001726 | CC ruffle (4)                                       |
| 231 | 303 | 376 | 8.28e-17  | 4691  |  | GO:0071944 | CC cell periphery (3)                               |
| 219 | 295 | 368 | 6.89e-16  | 4614  |  | GO:0005886 | CC plasma membrane (4)                              |
| 102 | 124 | 195 | 1.47e-10  | 2247  |  | GO:0044459 | CC plasma membrane part (5)                         |
| 11  | 12  | 21  | 7.71e-05  | 98    |  | GO:0009898 | CC internal side of plasma membrane (6)             |
| 31  | 27  | 39  | 1.93e-04  | 290   |  | GO:0016323 | CC basolateral plasma membrane (6)                  |
| 113 | 169 | 166 | 2.26e-23  | 1315  |  | GO:0000267 | CC cell fraction (3)                                |
| 64  | 89  | 72  | 5.60e-16  | 414   |  | GO:0005625 | CC soluble fraction (4)                             |
| 71  | 102 | 113 | 3.92e-11  | 1007  |  | GO:0005626 | CC insoluble fraction (4)                           |
| 63  | 93  | 105 | 1.34e-10  | 973   |  | GO:0005624 | CC membrane fraction (5)                            |
| 106 | 153 | 966 | 2.79e-174 | 12631 |  | GO:0044424 | CC intracellular part (3)                           |
| 85  | 133 | 321 | 6.82e-178 | 9357  |  | GO:0005737 | CC cytoplasm (4)                                    |
| 139 | 209 | 50  | 2.12e-69  | 606   |  | GO:0030529 | CC ribonucleoprotein complex (4)                    |
| 93  | 134 | 731 | 6.15e-122 | 10921 |  | GO:0043229 | CC intracellular organelle (4)                      |
| 40  | 45  | 241 | 2.32e-53  | 3164  |  | GO:0043232 | CC intracellular non-membrane-bounded organelle (5) |
| 105 | 93  | 14  | 4.19e-19  | 661   |  | GO:0005694 | CC chromosome (6)                                   |
| 29  | 32  | 1   | 3.92e-04  | 165   |  | GO:0000793 | CC condensed chromosome (7)                         |
| 205 | 240 | 178 | 1.34e-17  | 1778  |  | GO:0005856 | CC cytoskeleton (6)                                 |
| 62  | 73  | 61  | 4.66e-14  | 337   |  | GO:0015629 | CC actin cytoskeleton (7)                           |
| 103 | 121 | 69  | 5.50e-09  | 840   |  | GO:0015630 | CC microtubule cytoskeleton (7)                     |



|     |     |     |           |      |            |    |                                                          |
|-----|-----|-----|-----------|------|------------|----|----------------------------------------------------------|
| 13  | 21  | 29  | 3.60e-02  | 232  | GO:0045111 | CC | intermediate filament cytoskeleton (7)                   |
| 13  | 17  | 5   | 6.38e-06  | 38   | GO:0009295 | CC | nucleoid (6)                                             |
| 845 | 128 | 634 | 1.65e-102 | 9853 | GO:0043231 | CC | intracellular membrane-bounded organelle (5)             |
| 614 | 742 | 284 | 3.05e-51  | 6129 | GO:0005634 | CC | nucleus (6)                                              |
| 674 | 105 | 705 | 3.33e-149 | 6867 | GO:0044444 | CC | cytoplasmic part (4)                                     |
| 53  | 81  |     | 3.27e-07  | 456  | GO:0048471 | CC | perinuclear region of cytoplasm (5)                      |
| 391 | 545 | 582 | 6.65e-119 | 2361 | GO:0005829 | CC | cytosol (5)                                              |
| 1   | 8   |     | 2.02e-03  | 12   | GO:0000407 | CC | pre-autophagosomal structure (5)                         |
| 58  | 38  | 47  | 2.20e-40  | 190  | GO:0044445 | CC | cytosolic part (5)                                       |
| 6   | 7   | 6   | 6.55e-05  | 7    | GO:0005832 | CC | chaperonin-containing T-complex (6)                      |
| 36  | 28  | 25  | 1.39e-07  | 175  | GO:0005938 | CC | cell cortex (5)                                          |
| 19  | 16  | 14  | 2.90e-04  | 78   | GO:0044448 | CC | cell cortex part (5)                                     |
| 16  | 11  |     | 2.26e-05  | 48   | GO:0030863 | CC | cortical cytoskeleton (6)                                |
| 6   | 5   |     | 8.19e-03  | 9    | GO:0016281 | CC | eukaryotic translation initiation factor 4F complex (5)  |
| 5   | 1   |     | 1.91e-03  | 5    | GO:0070937 | CC | CRD-mediated mRNA stability complex (5)                  |
| 6   | 8   | 3   | 2.07e-02  | 15   | GO:0005852 | CC | eukaryotic translation initiation factor 3 complex (5)   |
| 95  | 146 | 164 | 7.79e-41  | 935  | GO:0031410 | CC | cytoplasmic vesicle (5)                                  |
| 92  | 136 | 151 | 2.34e-35  | 881  | GO:0016023 | CC | cytoplasmic membrane-bounded vesicle (6)                 |
| 32  | 46  |     | 3.10e-18  | 108  | GO:0048770 | CC | pigment granule (7)                                      |
| 32  | 46  |     | 3.10e-18  | 108  | GO:0042470 | CC | melanosome (8)                                           |
| 19  | 23  | 44  | 1.67e-09  | 244  | GO:0030141 | CC | secretory granule (7)                                    |
| 5   | 21  | 23  | 2.29e-02  | 158  | GO:0030133 | CC | transport vesicle (7)                                    |
| 21  | 47  | 36  | 1.17e-03  | 275  | GO:0030135 | CC | coated vesicle (7)                                       |
| 16  | 27  | 26  | 1.61e-02  | 188  | GO:0030136 | CC | clathrin-coated vesicle (8)                              |
| 9   | 19  | 10  | 8.99e-05  | 54   | GO:0005793 | CC | endoplasmic reticulum-Golgi intermediate compartment (5) |
| 14  | 64  | 105 | 1.15e-35  | 455  | GO:0005773 | CC | vacuole (5)                                              |
| 13  | 49  | 82  | 1.16e-30  | 401  | GO:0000323 | CC | lytic vacuole (6)                                        |
| 13  | 49  | 82  | 1.16e-30  | 401  | GO:0005764 | CC | lysosome (7)                                             |
| 1   | 13  | 5   | 8.84e-05  | 26   | GO:0005776 | CC | autophagic vacuole (6)                                   |
| 145 | 33  | 119 | 3.21e-60  | 1560 | GO:0005739 | CC | mitochondrion (5)                                        |
| 28  | 26  | 22  | 6.85e-05  | 144  | GO:0043292 | CC | contractile fiber (5)                                    |
| 25  | 23  | 22  | 8.62e-04  | 134  | GO:0030016 | CC | myofibril (6)                                            |
| 44  | 76  | 103 | 8.09e-20  | 666  | GO:0005768 | CC | endosome (5)                                             |
| 22  | 29  | 34  | 1.44e-04  | 231  | GO:0005769 | CC | early endosome (6)                                       |
| 3   | 10  | 17  | 4.33e-04  | 73   | GO:0055037 | CC | recycling endosome (6)                                   |
| 9   | 26  | 33  | 1.67e-06  | 185  | GO:0005770 | CC | late endosome (6)                                        |
| 67  | 143 | 126 | 2.93e-09  | 1251 | GO:0005794 | CC | Golgi apparatus (5)                                      |
| 12  | 27  |     | 1.66e-08  | 71   | GO:0030117 | CC | membrane coat (5)                                        |
| 50  | 83  | 31  | 1.70e-27  | 235  | GO:0005840 | CC | ribosome (5)                                             |
| 41  | 58  |     | 3.05e-33  | 99   | GO:0022626 | CC | cytosolic ribosome (6)                                   |
| 16  | 39  | 37  | 1.27e-23  | 77   | GO:0000502 | CC | proteasome complex (4)                                   |
| 5   | 10  | 7   | 4.09e-07  | 11   | GO:0022624 | CC | proteasome accessory complex (5)                         |
| 1   | 6   |     | 4.99e-03  | 7    | GO:0031588 | CC | AMP-activated protein kinase complex (4)                 |
| 3   | 11  | 14  | 1.47e-06  | 34   | GO:0005839 | CC | proteasome core complex (4)                              |
| 3   | 7   | 5   | 4.85e-04  | 8    | GO:0005838 | CC | proteasome regulatory particle (4)                       |
| 3   | 7   |     | 4.85e-04  | 8    | GO:0019773 | CC | proteasome core complex, alpha-subunit complex (4)       |
| 665 | 956 | 496 | 1.78e-113 | 6470 | GO:0044422 | CC | organelle part (2)                                       |
| 365 | 63  | 154 | 5.60e-64  | 2699 | GO:0043233 | CC | organelle lumen (3)                                      |
| 24  | 23  | 21  | 9.89e-04  | 126  | GO:0044449 | CC | contractile fiber part (3)                               |
| 22  | 21  | 20  | 1.47e-03  | 111  | GO:0030017 | CC | sarcomere (4)                                            |
| 164 | 342 | 225 | 6.10e-19  | 2445 | GO:0031090 | CC | organelle membrane (3)                                   |
| 25  | 51  | 52  | 5.99e-07  | 378  | GO:0012506 | CC | vesicle membrane (4)                                     |
| 685 | 975 | 487 | 3.61e-113 | 6391 | GO:0044446 | CC | intracellular organelle part (3)                         |
| 97  | 80  | 13  | 3.23e-18  | 561  | GO:0044427 | CC | chromosomal part (4)                                     |
| 10  | 9   | 2   | 3.72e-02  | 33   | GO:0005657 | CC | replication fork (5)                                     |
| 49  | 35  | 4   | 1.02e-05  | 331  | GO:0000785 | CC | chromatin (5)                                            |
| 24  | 23  | 6   | 4.77e-02  | 156  | GO:0000775 | CC | chromosome, centromeric region (5)                       |
| 5   | 3   | 2   | 1.09e-02  | 6    | GO:0005663 | CC | DNA replication factor C complex (5)                     |



|     |     |     |          |      |            |    |                                                     |
|-----|-----|-----|----------|------|------------|----|-----------------------------------------------------|
| 36  | 48  | 149 | 1.35e-64 | 2654 | GO:0070013 | CC | intracellular organelle lumen (4)                   |
| 42  | 66  | 29  | 1.03e-28 | 147  | GO:0044391 | CC | ribosomal subunit (4)                               |
| 23  | 40  | 68  | 7.28e-13 | 428  | GO:0044440 | CC | endosomal part (4)                                  |
| 22  | 39  | 66  | 3.97e-12 | 421  | GO:0010008 | CC | endosome membrane (5)                               |
| 1   | 4   | 10  | 4.32e-03 | 30   | GO:0055038 | CC | recycling endosome membrane (6)                     |
| 3   | 33  | 58  | 4.66e-16 | 281  | GO:0044437 | CC | vacuolar part (4)                                   |
| 3   | 27  | 47  | 1.01e-10 | 254  | GO:0005774 | CC | vacuolar membrane (5)                               |
| 3   | 18  | 35  | 6.49e-06 | 215  | GO:0005765 | CC | lysosomal membrane (6)                              |
| 1   | 6   | 15  | 7.34e-07 | 38   | GO:0005775 | CC | vacuolar lumen (5)                                  |
| 103 | 134 | 63  | 9.80e-37 | 834  | GO:0031967 | CC | organelle envelope (4)                              |
| 7   | 19  | 5   | 4.52e-04 | 59   | GO:0031970 | CC | organelle envelope lumen (5)                        |
| 13  | 36  | 14  | 4.22e-07 | 132  | GO:0031968 | CC | organelle outer membrane (5)                        |
| 51  | 111 | 28  | 6.20e-28 | 389  | GO:0019866 | CC | organelle inner membrane (5)                        |
| 151 | 172 | 126 | 2.12e-13 | 1264 | GO:0044430 | CC | cytoskeletal part (4)                               |
| 36  | 40  | 17  | 1.80e-04 | 226  | GO:0005819 | CC | spindle (5)                                         |
| 16  | 13  | 10  | 5.24e-06 | 44   | GO:0032432 | CC | actin filament bundle (5)                           |
| 16  | 15  | 11  | 4.40e-05 | 50   | GO:0042641 | CC | actomyosin (5)                                      |
| 15  | 13  | 10  | 1.52e-05 | 41   | GO:0001725 | CC | stress fiber (6)                                    |
| 54  | 61  | 34  | 9.33e-03 | 472  | GO:0005815 | CC | microtubule organizing center (5)                   |
| 44  | 47  | 27  | 2.42e-02 | 368  | GO:0005813 | CC | centrosome (6)                                      |
| 10  | 15  | 26  | 3.43e-02 | 196  | GO:0005882 | CC | intermediate filament (5)                           |
| 10  | 9   | 12  | 3.70e-02 | 53   | GO:0005884 | CC | actin filament (5)                                  |
| 9   | 7   |     | 4.22e-02 | 27   | GO:0030864 | CC | cortical actin cytoskeleton (5)                     |
| 4   | 1   | 2   | 3.20e-02 | 4    | GO:0005862 | CC | muscle thin filament tropomyosin (5)                |
| 341 | 422 | 133 | 6.87e-49 | 2528 | GO:0044428 | CC | nuclear part (4)                                    |
| 42  | 60  | 5   | 1.94e-22 | 151  | GO:0005681 | CC | spliceosomal complex (5)                            |
| 30  | 40  | 1   | 8.51e-18 | 84   | GO:0071013 | CC | catalytic step 2 spliceosome (6)                    |
| 2   | 12  | 1   | 2.96e-04 | 24   | GO:0005689 | CC | U12-type spliceosomal complex (6)                   |
| 16  | 14  |     | 8.50e-15 | 18   | GO:0030530 | CC | heterogeneous nuclear ribonucleoprotein complex (5) |
| 3   | 17  |     | 1.05e-07 | 31   | GO:0030532 | CC | small nuclear ribonucleoprotein complex (5)         |
| 20  | 18  | 3   | 1.05e-02 | 106  | GO:0016585 | CC | chromatin remodeling complex (5)                    |
| 46  | 55  | 25  | 1.68e-05 | 305  | GO:0005635 | CC | nuclear envelope (5)                                |
| 235 | 361 | 105 | 1.23e-43 | 2166 | GO:0031981 | CC | nuclear lumen (5)                                   |
| 234 | 266 | 74  | 2.75e-39 | 1543 | GO:0005654 | CC | nucleoplasm (5)                                     |
| 21  | 27  | 13  | 3.41e-06 | 87   | GO:0034399 | CC | nuclear periphery (5)                               |
| 106 | 103 | 15  | 8.38e-11 | 820  | GO:0044451 | CC | nucleoplasm part (5)                                |
| 56  | 50  | 4   | 5.18e-12 | 285  | GO:0016604 | CC | nuclear body (6)                                    |
| 30  | 30  |     | 3.36e-05 | 157  | GO:0016607 | CC | nuclear speck (7)                                   |
| 6   | 5   |     | 1.14e-04 | 6    | GO:0042382 | CC | paraspeckles (7)                                    |
| 14  | 9   |     | 7.61e-03 | 55   | GO:0017053 | CC | transcriptional repressor complex (6)               |
| 18  | 24  |     | 2.46e-05 | 77   | GO:0016363 | CC | nuclear matrix (5)                                  |
| 84  | 107 | 32  | 1.37e-09 | 615  | GO:0005730 | CC | nucleolus (5)                                       |
| 43  | 45  | 4   | 7.03e-05 | 288  | GO:0000228 | CC | nuclear chromosome (5)                              |
| 39  | 38  | 4   | 3.73e-05 | 242  | GO:0044454 | CC | nuclear chromosome part (6)                         |
| 6   | 6   |     | 1.14e-04 | 6    | GO:0042555 | CC | MCM complex (7)                                     |
| 26  | 55  | 55  | 1.54e-06 | 423  | GO:0044433 | CC | cytoplasmic vesicle part (4)                        |
| 22  | 50  | 50  | 1.69e-06 | 366  | GO:0030659 | CC | cytoplasmic vesicle membrane (5)                    |
| 12  | 32  | 22  | 4.82e-02 | 173  | GO:0030662 | CC | coated vesicle membrane (6)                         |
| 8   | 20  |     | 1.98e-08 | 40   | GO:0030120 | CC | vesicle coat (7)                                    |
| 1   | 5   | 13  | 3.97e-03 | 51   | GO:0030667 | CC | secretory granule membrane (6)                      |
| 79  | 270 | 48  | 1.11e-47 | 751  | GO:0044429 | CC | mitochondrial part (4)                              |
| 57  | 134 | 40  | 1.33e-30 | 537  | GO:0005740 | CC | mitochondrial envelope (5)                          |
| 45  | 91  | 15  | 1.62e-26 | 285  | GO:0005759 | CC | mitochondrial matrix (5)                            |
| 55  | 133 | 37  | 3.95e-30 | 510  | GO:0031966 | CC | mitochondrial membrane (5)                          |
| 9   | 43  | 10  | 2.49e-10 | 144  | GO:0044455 | CC | mitochondrial membrane part (6)                     |
| 43  | 104 | 27  | 3.46e-27 | 354  | GO:0005743 | CC | mitochondrial inner membrane (6)                    |
| 10  | 31  | 13  | 3.98e-06 | 111  | GO:0005741 | CC | mitochondrial outer membrane (6)                    |
| 6   | 17  | 4   | 1.37e-04 | 45   | GO:0005758 | CC | mitochondrial intermembrane space (5)               |
| 43  | 47  | 5   | 2.25e-06 | 36   | GO:0042645 | CC | mitochondrial nucleoid (5)                          |

|    |    |    |          |     |  |  |            |    |                                                                     |
|----|----|----|----------|-----|--|--|------------|----|---------------------------------------------------------------------|
| 13 | 17 | 5  | 2.23e-06 | 36  |  |  | GO:0042643 | CC | mitochondrial nucleoid (5)                                          |
| 18 | 32 | 17 | 2.47e-12 | 74  |  |  | GO:0015935 | CC | small ribosomal subunit (4)                                         |
| 17 | 28 |    | 8.31e-17 | 43  |  |  | GO:0022627 | CC | cytosolic small ribosomal subunit (5)                               |
| 24 | 34 | 12 | 3.15e-14 | 74  |  |  | GO:0015934 | CC | large ribosomal subunit (4)                                         |
| 24 | 30 |    | 1.22e-15 | 53  |  |  | GO:0022625 | CC | cytosolic large ribosomal subunit (5)                               |
| 1  | 15 | 2  | 1.70e-02 | 49  |  |  | GO:0030964 | CC | NADH dehydrogenase complex (1)                                      |
| 28 | 25 | 23 | 1.53e-02 | 186 |  |  | GO:0005912 | CC | adherens junction (1)                                               |
| 6  | 27 | 4  | 1.05e-06 | 83  |  |  | GO:0070469 | CC | respiratory chain (1)                                               |
| 1  | 15 | 2  | 1.70e-02 | 49  |  |  | GO:0045271 | CC | respiratory chain complex I (2)                                     |
| 3  | 23 | 3  | 9.18e-05 | 76  |  |  | GO:0005746 | CC | mitochondrial respiratory chain (2)                                 |
| 1  | 15 | 2  | 1.70e-02 | 49  |  |  | GO:0005747 | CC | mitochondrial respiratory chain complex I (3)                       |
| 14 | 14 | 28 | 1.02e-08 | 113 |  |  | GO:0019898 | CC | extrinsic to membrane (1)                                           |
| 8  | 11 | 23 | 5.00e-09 | 74  |  |  | GO:0019897 | CC | extrinsic to plasma membrane (2)                                    |
| 4  | 4  | 13 | 1.43e-03 | 47  |  |  | GO:0031234 | CC | extrinsic to internal side of plasma membrane (3)                   |
| 3  | 2  | 12 | 1.94e-04 | 34  |  |  | GO:0005834 | CC | heterotrimeric G-protein complex (4)                                |
| 7  | 18 | 17 | 4.12e-06 | 55  |  |  | GO:0016469 | CC | proton-transporting two-sector ATPase complex (1)                   |
| 2  | 7  | 10 | 1.40e-03 | 27  |  |  | GO:0033176 | CC | proton-transporting V-type ATPase complex (2)                       |
| 5  | 10 | 10 | 2.27e-05 | 19  |  |  | GO:0033178 | CC | proton-transporting two-sector ATPase complex, catalytic domain (2) |
| 2  | 5  | 6  | 8.67e-03 | 10  |  |  | GO:0033180 | CC | proton-transporting V-type ATPase, V1 domain (3)                    |
| 15 | 26 | 10 | 8.67e-07 | 77  |  |  | GO:0046930 | CC | pore complex (1)                                                    |
| 13 | 21 | 7  | 1.97e-05 | 60  |  |  | GO:0005643 | CC | nuclear pore (2)                                                    |
| 22 | 17 | 17 | 2.56e-02 | 131 |  |  | GO:0030055 | CC | cell-substrate junction (1)                                         |
| 21 | 16 | 16 | 4.56e-02 | 126 |  |  | GO:0005924 | CC | cell-substrate adherens junction (2)                                |
| 4  | 7  |    | 1.59e-02 | 11  |  |  | GO:0030132 | CC | clathrin coat of coated pit (1)                                     |
| 7  | 19 | 14 | 6.08e-04 | 60  |  |  | GO:0005798 | CC | Golgi-associated vesicle (1)                                        |
| 3  | 11 |    | 2.78e-04 | 20  |  |  | GO:0030137 | CC | COPI-coated vesicle (2)                                             |
| 6  | 13 | 7  | 6.03e-03 | 35  |  |  | GO:0030660 | CC | Golgi-associated vesicle membrane (1)                               |
| 3  | 9  |    | 3.11e-03 | 16  |  |  | GO:0030663 | CC | COPI coated vesicle membrane (2)                                    |
| 5  | 9  | 4  | 3.33e-02 | 20  |  |  | GO:0005753 | CC | mitochondrial proton-transporting ATP synthase complex (1)          |
|    | 7  |    | 2.02e-03 | 9   |  |  | GO:0030127 | CC | COPII vesicle coat (1)                                              |
| 19 | 35 | 32 | 2.74e-02 | 265 |  |  | GO:0005911 | CC | cell-cell junction (1)                                              |

|      |       |     | P-value  | T     |  | term ID    | term domain and name                                                 |
|------|-------|-----|----------|-------|--|------------|----------------------------------------------------------------------|
| 1    | 6     | 1   | 4.99e-03 | 7     |  | GO:0004679 | MF AMP-activated protein kinase activity (1)                         |
| 17   | 33    | 16  | 4.37e-02 | 180   |  | GO:0000287 | MF magnesium ion binding (1)                                         |
| 21   | 16    |     | 1.21e-02 | 116   |  | GO:0035257 | MF nuclear hormone receptor binding (1)                              |
| 16   | 13    |     | 7.12e-03 | 70    |  | GO:0035258 | MF steroid hormone receptor binding (2)                              |
| 108  | 154   | 929 | 7.20e-31 | 16378 |  | GO:0003674 | MF molecular_function (1)                                            |
| 15   | 11    | 15  | 5.20e-04 | 58    |  | GO:0016209 | MF antioxidant activity (2)                                          |
| 61   | 113   | 107 | 1.74e-03 | 1262  |  | GO:0005215 | MF transporter activity (2)                                          |
| 55   | 92    | 96  | 1.20e-04 | 1036  |  | GO:0022892 | MF substrate-specific transporter activity (3)                       |
| 19   | 29    | 12  | 5.66e-07 | 92    |  | GO:0008565 | MF protein transporter activity (4)                                  |
| 31   | 66    | 86  | 8.16e-03 | 988   |  | GO:0022857 | MF transmembrane transporter activity (3)                            |
| 13   | 31    | 54  | 1.44e-08 | 364   |  | GO:0022804 | MF active transmembrane transporter activity (4)                     |
| 8    | 21    | 32  | 9.11e-10 | 134   |  | GO:0015399 | MF primary active transmembrane transporter activity (5)             |
| 8    | 21    | 32  | 9.11e-10 | 134   |  | GO:0015405 | MF P-P-bond-hydrolysis-driven transmembrane transporter activity (6) |
| 30   | 62    | 81  | 2.20e-03 | 884   |  | GO:0022891 | MF substrate-specific transmembrane transporter activity (4)         |
| 96   | 126   | 85  | 2.06e-15 | 667   |  | GO:0005198 | MF structural molecule activity (2)                                  |
| 12   | 11    | 21  | 1.00e-05 | 88    |  | GO:0005200 | MF structural constituent of cytoskeleton (3)                        |
| 44   | 71    | 28  | 4.71e-27 | 178   |  | GO:0003735 | MF structural constituent of ribosome (3)                            |
| 994  | 138   | 796 | 1.14e-71 | 12549 |  | GO:0005488 | MF binding (2)                                                       |
| 3104 | 5246  |     | 3.97e-53 | 2699  |  | GO:0036094 | MF small molecule binding (3)                                        |
| 2994 | 43236 |     | 1.45e-52 | 2529  |  | GO:0000166 | MF nucleotide binding (4)                                            |
| 1983 | 24203 |     | 3.11e-28 | 1986  |  | GO:0032553 | MF ribonucleotide binding (5)                                        |
| 2013 | 3202  |     | 9.82e-28 | 1998  |  | GO:0017076 | MF purine nucleotide binding (5)                                     |
| 17   | 424   | 127 | 1.81e-21 | 1627  |  | GO:0030554 | MF adenylyl nucleotide binding (6)                                   |

|             |          |      |    |            |    |                                                                                    |
|-------------|----------|------|----|------------|----|------------------------------------------------------------------------------------|
| 198313202   | 6.55e-28 | 1985 | MF | G0:0032555 | MF | purine ribonucleotide binding (6)                                                  |
| 169259127   | 1.60e-21 | 1617 | MF | G0:0032559 | MF | adenyl ribonucleotide binding (7)                                                  |
| 197315198   | 8.73e-28 | 1953 | MF | G0:0035639 | MF | purine ribonucleoside triphosphate binding (7)                                     |
| 168255123   | 3.62e-21 | 1591 | MF | G0:0005524 | MF | ATP binding (8)                                                                    |
| 34 69 79    | 1.34e-20 | 411  | MF | G0:0019001 | MF | guanyl nucleotide binding (6)                                                      |
| 34 69 79    | 1.34e-20 | 411  | MF | G0:0032561 | MF | guanyl ribonucleotide binding (7)                                                  |
| 3 11        | 2.77e-02 | 29   | MF | G0:0019003 | MF | GDP binding (8)                                                                    |
| 33 69 79    | 1.82e-21 | 399  | MF | G0:0005525 | MF | GTP binding (8)                                                                    |
| 9 19 8      | 1.08e-03 | 62   | MF | G0:0043021 | MF | ribonucleoprotein complex binding (3)                                              |
| 853370101   | 9.60e-23 | 3509 | MF | G0:0003676 | MF | nucleic acid binding (3)                                                           |
| 204 24 68   | 2.68e-62 | 903  | MF | G0:0003723 | MF | RNA binding (4)                                                                    |
| 27 31 17    | 2.77e-07 | 107  | MF | G0:0008135 | MF | translation factor activity, nucleic acid binding (5)                              |
| 11 9 6      | 4.84e-03 | 33   | MF | G0:0003746 | MF | translation elongation factor activity (6)                                         |
| 14 19 11    | 1.26e-04 | 55   | MF | G0:0003743 | MF | translation initiation factor activity (6)                                         |
| 4 12 5      | 5.82e-03 | 30   | MF | G0:0000049 | MF | tRNA binding (5)                                                                   |
| 29 32 10    | 2.19e-11 | 87   | MF | G0:0003729 | MF | mRNA binding (5)                                                                   |
| 12 5 1      | 2.22e-05 | 26   | MF | G0:0003730 | MF | mRNA 3'-UTR binding (6)                                                            |
| 12 11 3     | 1.65e-03 | 36   | MF | G0:0003727 | MF | single-stranded RNA binding (5)                                                    |
| 6 5         | 4.06e-02 | 11   | MF | G0:0070717 | MF | poly-purine tract binding (6)                                                      |
| 6 4         | 8.19e-03 | 9    | MF | G0:0008143 | MF | poly(A) RNA binding (7)                                                            |
| 7 13        | 1.24e-02 | 37   | MF | G0:0019843 | MF | rRNA binding (5)                                                                   |
| 16 37 46    | 1.58e-02 | 436  | MF | G0:0030246 | MF | carbohydrate binding (3)                                                           |
| 11 28 30    | 4.82e-03 | 221  | MF | G0:0005529 | MF | sugar binding (4)                                                                  |
| 7 18 17     | 7.63e-06 | 57   | MF | G0:0048029 | MF | monosaccharide binding (5)                                                         |
| 37 67 26    | 3.08e-12 | 274  | MF | G0:0048037 | MF | cofactor binding (3)                                                               |
| 28 54 21    | 5.22e-12 | 194  | MF | G0:0050662 | MF | coenzyme binding (4)                                                               |
| 14 26 7     | 2.30e-12 | 49   | MF | G0:0051287 | MF | NAD binding (5)                                                                    |
| 8 6 1       | 2.67e-02 | 20   | MF | G0:0000062 | MF | fatty-acyl-CoA binding (5)                                                         |
| 723107 605  | 3.54e-93 | 7186 | MF | G0:0005515 | MF | protein binding (3)                                                                |
| 80 121      | 9.12e-06 | 836  | MF | G0:0042802 | MF | identical protein binding (4)                                                      |
| 133160 96   | 1.70e-13 | 1050 | MF | G0:0019899 | MF | enzyme binding (4)                                                                 |
| 53 53 38    | 3.11e-05 | 385  | MF | G0:0019900 | MF | kinase binding (5)                                                                 |
| 47 49 32    | 1.27e-04 | 336  | MF | G0:0019901 | MF | protein kinase binding (6)                                                         |
| 15 11 9     | 4.65e-05 | 44   | MF | G0:0005080 | MF | protein kinase C binding (7)                                                       |
| 23 25       | 4.79e-02 | 146  | MF | G0:0051020 | MF | GTPase binding (5)                                                                 |
| 28 23 19    | 7.00e-04 | 160  | MF | G0:0005516 | MF | calmodulin binding (4)                                                             |
| 68 61       | 6.44e-05 | 563  | MF | G0:0019904 | MF | protein domain specific binding (4)                                                |
| 33 41 29    | 5.20e-09 | 144  | MF | G0:0051082 | MF | unfolded protein binding (4)                                                       |
| 10 16 10    | 5.97e-03 | 51   | MF | G0:0051087 | MF | chaperone binding (4)                                                              |
| 95 100 72   | 4.42e-15 | 600  | MF | G0:0008092 | MF | cytoskeletal protein binding (4)                                                   |
| 66 62 53    | 8.71e-14 | 347  | MF | G0:0003779 | MF | actin binding (5)                                                                  |
| 18 15 12    | 4.08e-04 | 72   | MF | G0:0051015 | MF | actin filament binding (6)                                                         |
| 5 7 18      | 1.41e-02 | 102  | MF | G0:0019838 | MF | growth factor binding (4)                                                          |
| 95 100 65   | 1.54e-02 | 1006 | MF | G0:0030234 | MF | enzyme regulator activity (2)                                                      |
| 21 36       | 4.60e-03 | 185  | MF | G0:0009055 | MF | electron carrier activity (2)                                                      |
| 53 51 22    | 2.51e-02 | 476  | MF | G0:0000988 | MF | protein binding transcription factor activity (2)                                  |
| 53 51 22    | 1.28e-02 | 465  | MF | G0:0000989 | MF | transcription factor binding transcription factor activity (3)                     |
| 53 50 22    | 5.91e-03 | 453  | MF | G0:0003712 | MF | transcription cofactor activity (4)                                                |
| 42 7 95 439 | 1.09e-32 | 5640 | MF | G0:0003824 | MF | catalytic activity (2)                                                             |
| 27 38 17    | 9.10e-07 | 148  | MF | G0:0016853 | MF | isomerase activity (3)                                                             |
| 8 16 10     | 2.90e-04 | 42   | MF | G0:0016860 | MF | intramolecular oxidoreductase activity (4)                                         |
| 4 7 5       | 3.53e-02 | 12   | MF | G0:0016862 | MF | intramolecular oxidoreductase activity, interconverting keto- and enol-grou... (5) |
| 188322274   | 1.01e-30 | 2512 | MF | G0:0016787 | MF | hydrolase activity (3)                                                             |
| 37 66 60    | 9.92e-03 | 618  | MF | G0:0008233 | MF | peptidase activity (4)                                                             |
| 95 162134   | 1.96e-27 | 853  | MF | G0:0016817 | MF | hydrolase activity, acting on acid anhydrides (4)                                  |
| 95 162134   | 5.71e-28 | 843  | MF | G0:0016818 | MF | hydrolase activity, acting on acid anhydrides, in phosphorus-containing anh... (5) |
| 95 161134   | 3.93e-28 | 840  | MF | G0:0016462 | MF | pyrophosphatase activity (6)                                                       |
| 92 156131   | 7.21e-28 | 813  | MF | G0:0017111 | MF | nucleoside-triphosphatase activity (7)                                             |
| 68 161 5    | 4.25e-02 | 455  | MF | G0:0004286 | MF | helicase activity (8)                                                              |

|    |     |    |          |     |  |            |    |                                                                                    |
|----|-----|----|----------|-----|--|------------|----|------------------------------------------------------------------------------------|
| 28 | 34  | 5  | 1.35e-03 | 165 |  | GU:0004386 | MF | helicase activity (8)                                                              |
| 24 | 47  | 67 | 7.85e-27 | 242 |  | GO:0003924 | MF | GTPase activity (8)                                                                |
| 50 | 79  | 53 | 5.10e-10 | 389 |  | GO:0016887 | MF | ATPase activity (8)                                                                |
| 37 | 61  | 41 | 2.57e-06 | 317 |  | GO:0042623 | MF | ATPase activity, coupled (9)                                                       |
| 7  | 19  | 81 | 5.64e-10 | 124 |  | GO:0043492 | MF | ATPase activity, coupled to movement of substances (10)                            |
| 7  | 19  | 31 | 2.75e-09 | 131 |  | GO:0016820 | MF | hydrolase activity, acting on acid anhydrides, catalyzing transmembrane mov... (5) |
| 7  | 19  | 31 | 4.45e-10 | 123 |  | GO:0042626 | MF | ATPase activity, coupled to transmembrane movement of substances (6)               |
| 6  | 12  | 21 | 8.22e-03 | 128 |  | GO:0016798 | MF | hydrolase activity, acting on glycosyl bonds (4)                                   |
| 4  | 9   | 19 | 5.32e-03 | 105 |  | GO:0004553 | MF | hydrolase activity, hydrolyzing O-glycosyl compounds (5)                           |
| 44 | 74  | 34 | 2.45e-03 | 493 |  | GO:0016874 | MF | ligase activity (3)                                                                |
| 8  | 20  | 10 | 2.07e-05 | 55  |  | GO:0016875 | MF | ligase activity, forming carbon-oxygen bonds (4)                                   |
| 8  | 20  | 10 | 2.07e-05 | 55  |  | GO:0016876 | MF | ligase activity, forming aminoacyl-tRNA and related compounds (5)                  |
| 8  | 20  | 10 | 2.07e-05 | 55  |  | GO:0004812 | MF | aminoacyl-tRNA ligase activity (6)                                                 |
| 67 | 136 | 62 | 1.56e-14 | 746 |  | GO:0016491 | MF | oxidoreductase activity (3)                                                        |
| 10 | 9   | 10 | 4.61e-02 | 38  |  | GO:0016684 | MF | oxidoreductase activity, acting on peroxide as acceptor (4)                        |
| 10 | 9   | 10 | 4.61e-02 | 38  |  | GO:0004601 | MF | peroxidase activity (5)                                                            |
| 5  | 26  | 9  | 3.05e-04 | 99  |  | GO:0016651 | MF | oxidoreductase activity, acting on NADH or NADPH (4)                               |
| 2  | 18  | 4  | 3.95e-03 | 61  |  | GO:0016655 | MF | oxidoreductase activity, acting on NADH or NADPH, quinone or similar compou... (5) |
| 1  | 14  | 2  | 4.78e-02 | 47  |  | GO:0003954 | MF | NADH dehydrogenase activity (5)                                                    |
| 1  | 14  |    | 4.78e-02 | 47  |  | GO:0050136 | MF | NADH dehydrogenase (quinone) activity (6)                                          |
| 1  | 14  |    | 4.78e-02 | 47  |  | GO:0008137 | MF | NADH dehydrogenase (ubiquinone) activity (7)                                       |
| 19 | 42  | 16 | 1.00e-10 | 135 |  | GO:0016614 | MF | oxidoreductase activity, acting on CH-OH group of donors (4)                       |
| 19 | 42  | 16 | 1.79e-12 | 122 |  | GO:0016616 | MF | oxidoreductase activity, acting on the CH-OH group of donors, NAD or NADP a... (5) |
| 10 | 20  | 13 | 2.07e-05 | 55  |  | GO:0016667 | MF | oxidoreductase activity, acting on a sulfur group of donors (4)                    |
| 7  | 12  | 10 | 1.15e-02 | 33  |  | GO:0015036 | MF | disulfide oxidoreductase activity (5)                                              |
| 6  | 11  | 8  | 1.87e-02 | 28  |  | GO:0015035 | MF | protein disulfide oxidoreductase activity (6)                                      |
| 44 | 75  |    | 4.66e-02 | 544 |  | GO:0042803 | MF | protein homodimerization activity (1)                                              |
| 12 | 31  | 22 | 1.90e-06 | 108 |  | GO:0015078 | MF | hydrogen ion transmembrane transporter activity (1)                                |
| 5  | 10  | 7  | 8.10e-05 | 15  |  | GO:0046933 | MF | hydrogen ion transporting ATP synthase activity, rotational mechanism (2)          |
| 6  | 16  | 27 | 7.65e-14 | 69  |  | GO:0042625 | MF | ATPase activity, coupled to transmembrane movement of ions (1)                     |
| 3  | 9   | 19 | 1.60e-08 | 52  |  | GO:0015662 | MF | ATPase activity, coupled to transmembrane movement of ions, phosphorylative... (2) |
| 6  | 11  | 16 | 2.11e-09 | 32  |  | GO:0019829 | MF | cation-transporting ATPase activity (1)                                            |
| 5  | 10  | 11 | 2.15e-06 | 20  |  | GO:0046961 | MF | proton-transporting ATPase activity, rotational mechanism (2)                      |
| 37 | 39  | 8  | 5.68e-05 | 226 |  | GO:0043566 | MF | structure-specific DNA binding (1)                                                 |
| 22 | 20  | 5  | 1.84e-09 | 58  |  | GO:0003697 | MF | single-stranded DNA binding (2)                                                    |
| 2  | 3   | 8  | 3.30e-02 | 23  |  | GO:0015175 | MF | neutral amino acid transmembrane transporter activity (1)                          |
| 3  | 11  | 14 | 2.34e-06 | 35  |  | GO:0070003 | MF | threonine-type peptidase activity (1)                                              |
| 3  | 11  | 14 | 2.34e-06 | 35  |  | GO:0004298 | MF | threonine-type endopeptidase activity (2)                                          |
| 7  | 7   |    | 5.16e-05 | 8   |  | GO:0051920 | MF | peroxiredoxin activity (1)                                                         |
| 23 | 33  | 31 | 2.62e-03 | 226 |  | GO:0005543 | MF | phospholipid binding (1)                                                           |
| 8  | 10  | 9  | 6.83e-03 | 25  |  | GO:0005544 | MF | calcium-dependent phospholipid binding (2)                                         |

P-value T

term ID

term domain and name

798134 697 6.44e-123 6392

BIOGRID:000000

bi BioGRID interaction data (1)

P-value T

term ID

term domain and name

6 21 2 7.66e-06 51

HP:0001427

hp Mitochondrial inheritance (1)

7 18 27 6.84e-04 123

HP:0003468

hp Abnormality of the vertebrae (1)

6 15 24 2.32e-04 96

HP:0003312

hp Abnormal form of the vertebral bodies (2)

4 8 1.01e-02 16

HP:0003300

hp Ovoid vertebral bodies (3)

2 4 3.40e-02 4

HP:0003309

hp Ovoid thoracolumbar vertebrae (4)

5 6 13 4.69e-02 47

HP:0000926

hp Platyspondyly (1)

15 24 28 3.50e-02 158

HP:0100763

hp Abnormality of the lymphatic system (1)

15 24 28 3.50e-02 158

HP:0000000

hp Abnormality of the lymphatic system (1)

|    |     |    |          |     |            |    |                                                       |
|----|-----|----|----------|-----|------------|----|-------------------------------------------------------|
| 19 | 34  | 33 | 4.26e-02 | 203 | HP:0003271 | hp | Visceromegaly (1)                                     |
| 14 | 21  | 27 | 8.47e-03 | 139 | HP:0001743 | hp | Abnormality of the spleen (1)                         |
| 13 | 21  | 27 | 1.87e-03 | 129 | HP:0001744 | hp | Splenomegaly (2)                                      |
| 4  | 10  |    | 2.35e-03 | 22  | HP:0000943 | hp | Dysostosis multiplex (1)                              |
| 2  | 6   |    | 5.38e-03 | 8   | HP:0011012 | hp | Abnormality of polysaccharide metabolism (1)          |
| 3  | 6   |    | 3.50e-02 | 10  | HP:0004367 | hp | Abnormality of glycoprotein metabolism (1)            |
| 2  | 6   |    | 5.38e-03 | 8   | HP:0004355 | hp | Abnormality of proteoglycan metabolism (2)            |
| 2  | 4   |    | 3.40e-02 | 4   | HP:0002159 | hp | Heparan sulfate excretion in urine (3)                |
| 18 | 39  | 6  | 1.21e-04 | 159 | HP:0004360 | hp | Abnormality of acid-base homeostasis (1)              |
| 17 | 38  | 4  | 2.13e-05 | 144 | HP:0001941 | hp | Acidosis (2)                                          |
| 9  | 22  | 2  | 3.48e-03 | 75  | HP:0003128 | hp | Lactic acidosis (3)                                   |
| 7  | 17  | 2  | 2.81e-04 | 42  | HP:0002151 | hp | Increased serum lactate (3)                           |
| 19 | 32  | 14 | 4.81e-03 | 136 | HP:0001637 | hp | Abnormality of the myocardium (1)                     |
| 19 | 31  | 14 | 9.89e-03 | 134 | HP:0001638 | hp | Cardiomyopathy (2)                                    |
| 3  | 4   | 8  | 1.01e-02 | 16  | HP:0001387 | hp | Joint stiffness (1)                                   |
| 2  | 4   |    | 3.40e-02 | 4   | HP:0003033 | hp | Mild joint stiffness (2)                              |
| 10 | 24  | 3  | 1.20e-02 | 92  | HP:0001943 | hp | Hypoglycemia (1)                                      |
| 3  | 12  | 1  | 3.81e-02 | 32  | HP:0002490 | hp | Increased CSF lactate (1)                             |
| 12 | 25  | 7  | 1.77e-02 | 100 | HP:0004372 | hp | Reduced consciousness/confusion (1)                   |
| 7  | 4   | 2  | 4.21e-02 | 15  | HP:0000424 | hp | Broad nasal root (1)                                  |
| 26 | 47  | 40 | 6.78e-03 | 248 | HP:0001276 | hp | Hypertonia (1)                                        |
| 18 | 37  | 31 | 1.09e-02 | 174 | HP:0001257 | hp | Spasticity (2)                                        |
| 3  | 12  | 20 | 3.33e-05 | 63  | HP:0000280 | hp | Coarse facial features (1)                            |
| 27 | 44  | 24 | 1.05e-02 | 222 | HP:0002795 | hp | Functional respiratory abnormality (1)                |
| 2  | 4   |    | 3.40e-02 | 4   | HP:0000900 | hp | Thickened ribs (1)                                    |
| 2  | 5   | 12 | 1.06e-04 | 25  | HP:0008518 | hp | Aplasia/Hypoplasia involving the vertebral column (1) |
| 73 | 115 | 81 | 8.49e-03 | 794 | HP:0003011 | hp | Abnormality of musculature (1)                        |
| 8  | 8   | 2  | 1.10e-02 | 17  | HP:0003201 | hp | Rhabdomyolysis (2)                                    |
| 12 | 31  | 7  | 1.17e-03 | 122 | HP:0004354 | hp | Abnormality of carboxylic acid metabolism (1)         |
| 9  | 28  | 7  | 4.61e-03 | 111 | HP:0004337 | hp | Abnormality of amino acid metabolism (2)              |
| 4  | 11  | 23 | 4.28e-03 | 104 | HP:0001268 | hp | Mental deterioration (1)                              |
| 71 | 103 | 74 | 6.26e-03 | 667 | HP:0000004 | hp | Onset and clinical course (1)                         |
| 26 | 44  | 28 | 9.43e-04 | 204 | HP:0003679 | hp | Pace of progression (2)                               |
| 5  | 9   | 4  | 6.39e-03 | 16  | HP:0001432 | hp | Early death (3)                                       |

|    |    | P-value | T        | term ID | term domain and name                                    |
|----|----|---------|----------|---------|---------------------------------------------------------|
| 11 | 22 | 111     | 1.24e-06 | 1187    | KEGG:01100 ke Metabolic pathways (1)                    |
| 5  | 11 | 9       | 1.77e-02 | 27      | KEGG:00030 ke Pentose phosphate pathway (1)             |
| 8  | 17 | 21      | 4.05e-07 | 60      | KEGG:05110 ke Vibrio cholerae infection (1)             |
| 17 | 14 | 14      | 2.91e-03 | 63      | KEGG:05130 ke Pathogenic Escherichia coli infection (1) |
| 6  | 20 | 7       | 7.78e-06 | 42      | KEGG:00620 ke Pyruvate metabolism (1)                   |
| 3  | 8  | 11      | 3.47e-03 | 33      | KEGG:04966 ke Collecting duct acid secretion (1)        |
| 4  | 10 |         | 5.55e-05 | 19      | KEGG:00531 ke Glycosaminoglycan degradation (1)         |
| 29 | 56 | 20      | 4.87e-08 | 181     | KEGG:05016 ke Huntington's disease (1)                  |
| 3  | 9  |         | 6.18e-03 | 24      | KEGG:00511 ke Other glycan degradation (1)              |

|    |    |    |          |     |
|----|----|----|----------|-----|
| 11 | 32 | 29 | 5.22e-15 | 58  |
| 8  | 19 | 20 | 4.33e-05 | 70  |
| 43 | 59 | 4  | 1.32e-12 | 157 |
| 4  | 10 | 5  | 3.60e-02 | 23  |
| 28 | 26 | 9  | 4.38e-04 | 124 |
| 36 | 35 | 33 | 1.47e-02 | 211 |
| 7  | 10 | 10 | 3.27e-02 | 35  |
| 6  | 20 | 10 | 1.13e-04 | 48  |
| 14 | 48 | 25 | 7.41e-09 | 137 |
| 14 | 18 | 15 | 4.12e-02 | 70  |
| 14 | 14 | 2  | 8.38e-05 | 35  |
| 16 | 14 | 22 | 1.28e-02 | 115 |
| 27 | 48 | 23 | 4.37e-05 | 174 |
| 27 | 24 | 23 | 9.56e-03 | 138 |
| 10 | 13 | 18 | 4.92e-03 | 79  |
| 8  | 20 | 3  | 2.04e-05 | 44  |
| 8  | 10 | 2  | 3.60e-02 | 23  |
| 8  | 14 | 18 | 1.92e-03 | 74  |
| 11 | 15 | 8  | 4.63e-02 | 45  |
| 22 | 44 | 16 | 1.23e-07 | 129 |
| 27 | 55 | 32 | 4.39e-07 | 186 |
| 24 | 27 | 4  | 3.20e-04 | 96  |
| 13 | 23 | 16 | 5.32e-04 | 65  |
| 4  | 15 | 3  | 4.19e-04 | 32  |
| 41 | 57 | 18 | 7.16e-10 | 169 |
| 15 | 29 | 48 | 9.38e-05 | 285 |
| 7  | 19 | 5  | 6.19e-08 | 31  |
| 15 | 18 | 12 | 2.58e-02 | 61  |
| 3  | 14 | 2  | 5.28e-03 | 34  |
| 42 | 57 | 28 | 6.45e-25 | 94  |
| 5  | 23 | 51 | 4.48e-20 | 135 |

P-value T

|    |     |    |          |     |
|----|-----|----|----------|-----|
| 74 | 96  | 36 | 2.49e-03 | 754 |
| 66 | 114 | 76 | 1.23e-05 | 810 |
| 75 | 87  | 50 | 2.04e-03 | 763 |
| 61 | 104 | 50 | 6.65e-03 | 821 |
| 70 | 99  | 50 | 2.83e-03 | 757 |
| 73 | 102 | 56 | 1.23e-03 | 771 |
| 63 | 96  | 56 | 4.86e-03 | 738 |

|            |    |                                                                |
|------------|----|----------------------------------------------------------------|
| KEGG:03050 | ke | Proteasome (1)                                                 |
| KEGG:04721 | ke | Synaptic vesicle cycle (1)                                     |
| KEGG:03040 | ke | Spliceosome (1)                                                |
| KEGG:03060 | ke | Protein export (1)                                             |
| KEGG:04110 | ke | Cell cycle (1)                                                 |
| KEGG:04810 | ke | Regulation of actin cytoskeleton (1)                           |
| KEGG:04130 | ke | SNARE interactions in vesicular transport (1)                  |
| KEGG:00970 | ke | Aminoacyl-tRNA biosynthesis (1)                                |
| KEGG:00190 | ke | Oxidative phosphorylation (1)                                  |
| KEGG:05100 | ke | Bacterial invasion of epithelial cells (1)                     |
| KEGG:03030 | ke | DNA replication (1)                                            |
| KEGG:04670 | ke | Leukocyte transendothelial migration (1)                       |
| KEGG:05010 | ke | Alzheimer's disease (1)                                        |
| KEGG:04530 | ke | Tight junction (1)                                             |
| KEGG:04520 | ke | Adherens junction (1)                                          |
| KEGG:00280 | ke | Valine, leucine and isoleucine degradation (1)                 |
| KEGG:03430 | ke | Mismatch repair (1)                                            |
| KEGG:05120 | ke | Epithelial cell signaling in Helicobacter pylori infection (1) |
| KEGG:00480 | ke | Glutathione metabolism (1)                                     |
| KEGG:05012 | ke | Parkinson's disease (1)                                        |
| KEGG:04141 | ke | Protein processing in endoplasmic reticulum (1)                |
| KEGG:03015 | ke | mRNA surveillance pathway (1)                                  |
| KEGG:00010 | ke | Glycolysis / Gluconeogenesis (1)                               |
| KEGG:00640 | ke | Propanoate metabolism (1)                                      |
| KEGG:03013 | ke | RNA transport (1)                                              |
| KEGG:04145 | ke | Phagosome (1)                                                  |
| KEGG:00020 | ke | Citrate cycle (TCA cycle) (1)                                  |
| KEGG:05131 | ke | Shigellosis (1)                                                |
| KEGG:04140 | ke | Regulation of autophagy (1)                                    |
| KEGG:03010 | ke | Ribosome (1)                                                   |
| KEGG:04142 | ke | Lysosome (1)                                                   |

term ID term domain and name

|                    |    |                        |
|--------------------|----|------------------------|
| MI:hsa-miR-429     | mi | MI:hsa-miR-429 (1)     |
| MI:hsa-miR-582-3p  | mi | MI:hsa-miR-582-3p (1)  |
| MI:hsa-miR-451     | mi | MI:hsa-miR-451 (1)     |
| MI:hsa-let-7g*     | mi | MI:hsa-let-7g* (1)     |
| MI:hsa-miR-548d-5p | mi | MI:hsa-miR-548d-5p (1) |
| MI:hsa-miR-548c-5p | mi | MI:hsa-miR-548c-5p (1) |
| MI:hsa-miR-548a-5p | mi | MI:hsa-miR-548a-5p (1) |



|    |       |          |          |     |                    |                                                                       |
|----|-------|----------|----------|-----|--------------------|-----------------------------------------------------------------------|
| 85 | 10452 | 1.31e-02 | 943      |     | MI:hsa-miR-519c-3p | MI:hsa-miR-519c-3p (1)                                                |
| 58 | 85    | 3.18e-02 | 667      |     | MI:hsa-miR-142-5p  | MI:hsa-miR-142-5p (1)                                                 |
| 67 | 78    | 3.00e-02 | 716      |     | MI:hsa-miR-195     | MI:hsa-miR-195 (1)                                                    |
| 96 | 11061 | 6.74e-05 | 970      |     | MI:hsa-miR-548d-3p | MI:hsa-miR-548d-3p (1)                                                |
| 80 | 98    | 2.47e-03 | 834      |     | MI:hsa-miR-200b    | MI:hsa-miR-200b (1)                                                   |
| 74 | 96    | 1.23e-02 | 790      |     | MI:hsa-miR-548b-5p | MI:hsa-miR-548b-5p (1)                                                |
| 55 | 85    | 1.07e-02 | 647      |     | MI:hsa-miR-561     | MI:hsa-miR-561 (1)                                                    |
| 60 | 90    | 1.20e-02 | 697      |     | MI:hsa-miR-191     | MI:hsa-miR-191 (1)                                                    |
|    |       | P-value  | T        |     | term ID            | term domain and name                                                  |
| 3  | 2     | 10       | 4.49e-02 | 25  | REAC:167433        | re G-protein beta-gamma subunits rebind the alpha-GDP subunit (1)     |
| 13 | 29    | 16       | 6.33e-11 | 41  | REAC:199991        | re Membrane Trafficking (1)                                           |
| 5  | 10    | 4        | 1.21e-05 | 10  | REAC:199983        | re Golgi to ER Retrograde Transport (2)                               |
| 5  | 10    | 4        | 1.21e-05 | 10  | REAC:199997        | re COPI Mediated Transport (3)                                        |
| 4  | 9     | 4        | 6.70e-05 | 9   | REAC:200461        | re GAP Recruitment to the Coatome:Arf1-GTP Complex (4)                |
| 4  | 9     | 4        | 6.70e-05 | 9   | REAC:200456        | re Hydrolysis of Arf1-GTP to Arf1-GDP (4)                             |
| 4  | 9     | 4        | 6.70e-05 | 9   | REAC:200462        | re Coatome:Arf1-GTP:GAP lattice formation on golgi membrane (4)       |
| 4  | 9     | 4        | 6.70e-05 | 9   | REAC:200459        | re Diffusion of inactive Arf1-GDP from membrane (4)                   |
| 3  | 8     | 4        | 3.69e-04 | 8   | REAC:199990        | re Coat Complex Formation (4)                                         |
| 4  | 8     | 3        | 3.69e-04 | 8   | REAC:200516        | re Sculpting and pinching-off of Golgi vessicle (4)                   |
| 4  | 8     | 3        | 3.69e-04 | 8   | REAC:200604        | re Golgi vesicle lattice disassociation (4)                           |
| 9  | 14    | 10       | 4.06e-03 | 24  | REAC:199992        | re trans-Golgi Network Vesicle Budding (2)                            |
| 9  | 13    | 10       | 6.90e-03 | 22  | REAC:375433        | re Vamp7 associated clathrin derived vesicle budding (3)              |
|    | 7     | 3        | 1.37e-02 | 8   | REAC:203996        | re Vesicle Uncoating (1)                                              |
| 7  | 6     | 2        | 4.98e-02 | 11  | REAC:110306        | re Repair synthesis for gap-filling by DNA pol epsilon in TC-NER (1)  |
| 4  | 3     | 9        | 6.46e-03 | 17  | REAC:163624        | re Glucagon:GCCR mediates GTP-GDP exchange (1)                        |
| 29 | 46    | 34       | 4.79e-08 | 101 | REAC:69306         | re DNA Replication (1)                                                |
| 21 | 43    | 32       | 5.13e-10 | 82  | REAC:69002         | re DNA Replication Pre-Initiation (2)                                 |
| 20 | 40    | 32       | 6.66e-11 | 74  | REAC:69304         | re Regulation of DNA replication (2)                                  |
| 20 | 40    | 32       | 6.66e-11 | 74  | REAC:69300         | re Removal of licensing factors from origins (3)                      |
| 60 | 81    | 48       | 4.24e-02 | 306 | REAC:69278         | re Cell Cycle, Mitotic (1)                                            |
| 31 | 47    | 35       | 5.05e-08 | 106 | REAC:69242         | re S Phase (2)                                                        |
| 29 | 46    | 34       | 5.34e-09 | 96  | REAC:69239         | re Synthesis of DNA (3)                                               |
| 20 | 40    | 32       | 2.58e-11 | 72  | REAC:69052         | re Switching of origins to a post-replicative state (4)               |
| 20 | 40    | 32       | 2.58e-11 | 72  | REAC:68949         | re Orc1 removal from chromatin (5)                                    |
| 12 | 34    | 32       | 1.90e-15 | 56  | REAC:68948         | re Ubiquitinated Orc1 is degraded by the proteasome (6)               |
| 12 | 34    | 32       | 7.92e-15 | 58  | REAC:69017         | re CDK-mediated phosphorylation and removal of Cdc6 (5)               |
| 12 | 34    | 32       | 3.92e-15 | 57  | REAC:69016         | re Ubiquitinated Cdc6 is degraded by the proteasome (6)               |
| 6  | 6     |          | 1.87e-03 | 6   | REAC:69019         | re Mcm4,6,7 trimer forms and associates with the replication fork (5) |
| 15 | 12    | 2        | 2.53e-04 | 29  | REAC:69190         | re DNA strand elongation (4)                                          |
| 7  | 6     |          | 2.04e-02 | 10  | REAC:176974        | re Unwinding of DNA (5)                                               |
| 6  | 6     |          | 1.87e-03 | 6   | REAC:169468        | re MCM2-7 mediated fork unwinding (6)                                 |
| 7  | 6     |          | 6.91e-03 | 9   | REAC:176942        | re Multiple proteins are localized at replication fork (6)            |
| 13 | 34    | 32       | 7.92e-15 | 58  | REAC:75815         | re Ubiquitin-dependent degradation of Cyclin D (3)                    |
| 13 | 34    | 32       | 7.92e-15 | 58  | REAC:69229         | re Ubiquitin-dependent degradation of Cyclin D1 (4)                   |
| 12 | 34    | 32       | 3.92e-15 | 57  | REAC:75825         | re Proteasome mediated degradation of Cyclin D1 (5)                   |
| 15 | 35    | 33       | 6.85e-13 | 69  | REAC:69656         | re Cyclin A:Cdk2-associated events at S phase entry (3)               |
| 28 | 45    | 34       | 1.29e-07 | 104 | REAC:69206         | re G1/S Transition (2)                                                |
| 15 | 35    | 33       | 1.18e-12 | 70  | REAC:69202         | re Cyclin E associated events during G1/S transition (3)              |
| 13 | 35    | 33       | 1.05e-14 | 62  | REAC:187577        | re SCF(Skp2)-mediated degradation of p27/p21 (4)                      |
| 13 | 35    | 33       | 1.05e-14 | 62  | REAC:187574        | re Degradation of ubiquitinated p27/p21 by the 26S proteasome (5)     |
| 18 | 40    | 32       | 3.40e-12 | 68  | REAC:68874         | re M/G1 Transition (2)                                                |

|    |    |    |          |     |             |    |                                                                                    |
|----|----|----|----------|-----|-------------|----|------------------------------------------------------------------------------------|
| 18 | 40 | 32 | 3.40e-12 | 68  | REAC:68867  | re | Assembly of the pre-replicative complex (3)                                        |
| 12 | 34 | 32 | 1.09e-13 | 62  | REAC:68827  | re | CDT1 association with the CDC6:ORC:origin complex (4)                              |
| 12 | 34 | 32 | 3.92e-15 | 57  | REAC:68825  | re | Ubiquitinated geminin is degraded by the proteasome (5)                            |
| 14 | 37 | 33 | 1.08e-09 | 85  | REAC:174143 | re | APC/C-mediated degradation of cell cycle proteins (2)                              |
| 14 | 37 | 33 | 3.25e-10 | 82  | REAC:176408 | re | Regulation of APC/C activators between G1/S and early anaphase (3)                 |
| 12 | 35 | 33 | 1.05e-14 | 62  | REAC:174113 | re | SCF-beta-TrCP mediated degradation of Emi1 (4)                                     |
| 12 | 35 | 33 | 1.05e-14 | 62  | REAC:174203 | re | SCF-mediated degradation of Emi1 (5)                                               |
| 12 | 34 | 32 | 1.58e-11 | 71  | REAC:174084 | re | Autodegradation of Cdh1 by Cdh1:APC/C (3)                                          |
| 12 | 34 | 32 | 1.58e-11 | 71  | REAC:174058 | re | Degradation of multiubiquitinated Cdh1 (4)                                         |
| 12 | 35 | 32 | 1.65e-10 | 76  | REAC:174178 | re | APC/C:Cdh1 mediated degradation of Cdc20 and other APC/C:Cdh1 targeted prot... (3) |
| 12 | 35 | 32 | 1.65e-10 | 76  | REAC:174105 | re | Degradation of multiubiquitinated cell cycle proteins (4)                          |
| 14 | 36 | 32 | 2.56e-10 | 77  | REAC:176814 | re | Activation of APC/C and APC/C:Cdc20 mediated degradation of mitotic protein... (3) |
| 14 | 35 | 32 | 1.65e-10 | 76  | REAC:176409 | re | APC/C:Cdc20 mediated degradation of mitotic proteins (4)                           |
| 12 | 34 | 32 | 2.58e-11 | 72  | REAC:174154 | re | APC/C:Cdc20 mediated degradation of Securin (5)                                    |
| 12 | 34 | 32 | 2.58e-11 | 72  | REAC:174202 | re | Degradation of multiubiquitinated Securin (6)                                      |
| 6  | 7  | 6  | 3.39e-02 | 9   | REAC:390450 | re | Folding of actin by CCT/TriC (1)                                                   |
| 6  | 7  | 6  | 3.39e-02 | 9   | REAC:390459 | re | Exchange of ADP for ATP in CCT/TriC:actin complex (2)                              |
| 6  | 7  | 6  | 3.39e-02 | 9   | REAC:390453 | re | Hydrolysis of ATP and release of folded actin from CCT/TriC (2)                    |
| 19 | 29 | 19 | 4.76e-02 | 82  | REAC:15869  | re | Metablism of nucleotides (1)                                                       |
| 16 | 23 | 13 | 1.72e-03 | 50  | REAC:73847  | re | Purine metabolism (2)                                                              |
| 6  | 6  |    | 4.13e-02 | 8   | REAC:68954  | re | Mcm2-7 is phosphorylated by DDK (1)                                                |
| 5  | 6  | 11 | 4.19e-03 | 24  | REAC:195146 | re | Dissociation of Rho GTP:GDP from GDI complex (1)                                   |
| 53 | 67 | 37 | 4.01e-21 | 111 | REAC:157279 | re | 3' -UTR-mediated translational regulation (1)                                      |
| 53 | 67 | 37 | 4.01e-21 | 111 | REAC:156827 | re | L13a-mediated translational silencing of Ceruloplasmin expression (2)              |
| 24 | 29 | 12 | 1.00e-07 | 50  | REAC:156826 | re | Dissociation of L13a from the 60s ribosomal subunit (3)                            |
| 30 | 39 | 25 | 1.70e-12 | 62  | REAC:156823 | re | Association of phospho-L13a with GAIT element of Ceruloplasmin mRNA (3)            |
| 13 | 35 | 32 | 3.92e-15 | 57  | REAC:212919 | re | Regulation of activated PAK-2p34 by proteasome mediated degradation (1)            |
| 13 | 35 | 32 | 3.92e-15 | 57  | REAC:212917 | re | Proteasome mediated degradation of PAK-2p34 (2)                                    |
| 27 | 62 | 45 | 1.67e-06 | 177 | REAC:71291  | re | Metabolism of amino acids (1)                                                      |
| 15 | 38 | 33 | 1.99e-12 | 71  | REAC:70694  | re | Ornithine and proline metabolism (2)                                               |
| 14 | 37 | 33 | 3.94e-13 | 68  | REAC:70693  | re | Ornithine metabolism (3)                                                           |
| 13 | 34 | 32 | 5.82e-14 | 61  | REAC:350562 | re | Regulation of ornithine decarboxylase (ODC) (4)                                    |
| 12 | 33 | 31 | 1.69e-13 | 59  | REAC:353125 | re | 26S proteasome degrades ODC holoenzyme complex (5)                                 |
| 27 | 47 | 33 | 6.66e-06 | 118 | REAC:69620  | re | Cell Cycle Checkpoints (1)                                                         |
| 13 | 34 | 32 | 6.50e-13 | 65  | REAC:69615  | re | G1/S DNA Damage Checkpoints (2)                                                    |
| 12 | 34 | 32 | 3.92e-15 | 57  | REAC:69613  | re | p53-Independent G1/S DNA damage checkpoint (3)                                     |
| 12 | 34 | 32 | 3.92e-15 | 57  | REAC:69610  | re | p53-Independent DNA Damage Response (4)                                            |
| 12 | 34 | 32 | 3.92e-15 | 57  | REAC:69601  | re | Ubiquitin Mediated Degradation of Phosphorylated Cdc25A (5)                        |
| 12 | 34 | 32 | 3.92e-15 | 57  | REAC:69600  | re | Proteolytic degradation of ubiquitinated-Cdc25A (6)                                |
|    | 7  | 3  | 1.37e-02 | 8   | REAC:204008 | re | Cargo, Sec31p:Sec13p, and v-SNARE recruitment (1)                                  |
| 5  | 3  |    | 1.43e-02 | 5   | REAC:175174 | re | Association of Ku heterodimer with viral DNA ends (1)                              |
| 75 | 95 | 33 | 3.99e-30 | 160 | REAC:168254 | re | Influenza Infection (1)                                                            |
| 74 | 93 | 33 | 6.05e-30 | 155 | REAC:168255 | re | Influenza Life Cycle (2)                                                           |
| 70 | 91 | 30 | 1.88e-29 | 151 | REAC:168273 | re | Influenza Viral RNA Transcription and Replication (3)                              |
| 41 | 56 | 28 | 2.86e-18 | 90  | REAC:192823 | re | Viral mRNA Translation (4)                                                         |
| 41 | 56 | 28 | 2.86e-18 | 90  | REAC:192841 | re | Viral Protein Synthesis (5)                                                        |
| 41 | 56 | 28 | 2.86e-18 | 90  | REAC:192704 | re | Synthesis of PB1-F2 (5)                                                            |
| 29 | 35 | 2  | 4.02e-09 | 62  | REAC:168325 | re | Viral Messenger RNA Synthesis (4)                                                  |
| 29 | 35 | 2  | 2.11e-09 | 61  | REAC:192781 | re | Viral mRNA Splicing (M, NS segments) (5)                                           |
| 13 | 37 | 34 | 3.62e-15 | 64  | REAC:195721 | re | Signaling by Wnt (1)                                                               |
| 13 | 37 | 34 | 3.62e-15 | 64  | REAC:195253 | re | Degradation of beta-catenin by the destruction complex (2)                         |
| 13 | 37 | 34 | 3.62e-15 | 64  | REAC:195298 | re | Degradation of ubiquitinated -beta catenin by the proteasome (3)                   |

|     |     |    |          |     |             |    |                                                                                    |
|-----|-----|----|----------|-----|-------------|----|------------------------------------------------------------------------------------|
| 33  | 80  | 39 | 5.33e-09 | 217 | REAC:381150 | re | Diabetes pathways (1)                                                              |
| 8   | 15  | 5  | 7.98e-03 | 28  | REAC:71406  | re | Pyruvate metabolism and TCA cycle (1)                                              |
| 21  | 36  | 25 | 1.27e-03 | 95  | REAC:71387  | re | Metabolism of carbohydrates (1)                                                    |
| 16  | 31  | 21 | 1.39e-03 | 77  | REAC:70326  | re | Glucose metabolism (2)                                                             |
| 12  | 17  | 11 | 4.55e-03 | 33  | REAC:70263  | re | Gluconeogenesis (3)                                                                |
| 36  | 82  | 41 | 1.93e-09 | 221 | REAC:163685 | re | Integration of energy metabolism (1)                                               |
| 1   | 11  | 2  | 9.21e-03 | 17  | REAC:200409 | re | Activated AMPK stimulates fatty-acid oxidation in muscle (2)                       |
| 1   | 10  | 2  | 5.60e-04 | 12  | REAC:200421 | re | Activation of cytosolic AMPK by phosphorylation (3)                                |
| 27  | 62  | 25 | 1.32e-08 | 153 | REAC:265764 | re | Glucose Regulation of Insulin Secretion (2)                                        |
| 8   | 30  | 6  | 5.82e-03 | 78  | REAC:163200 | re | Electron Transport Chain (3)                                                       |
| 3   | 8   | 1  | 1.17e-02 | 10  | REAC:164651 | re | Electron transfer from ubiquinol to cytochrome c of complex III (4)                |
| 9   | 9   | 10 | 1.18e-02 | 22  | REAC:70171  | re | Glycolysis (3)                                                                     |
| 5   | 11  | 1  | 9.21e-03 | 17  | REAC:71403  | re | Citric acid cycle (TCA cycle) (3)                                                  |
| 40  | 60  | 2  | 2.07e-15 | 111 | REAC:72203  | re | Processing of Capped Intron-Containing Pre-mRNA (1)                                |
| 118 | 162 | 57 | 1.94e-25 | 407 | REAC:74160  | re | Gene Expression (1)                                                                |
| 47  | 64  | 3  | 2.32e-08 | 162 | REAC:75983  | re | Formation and Maturation of mRNA Transcript (2)                                    |
| 46  | 63  | 3  | 1.46e-10 | 144 | REAC:112295 | re | Elongation and Processing of Capped Transcripts (3)                                |
| 46  | 63  | 3  | 1.46e-10 | 144 | REAC:76043  | re | Elongation of Intron-Containing Transcripts and co-transcriptional mRNA spl... (4) |
| 19  | 19  | 2  | 1.41e-06 | 34  | REAC:72103  | re | Formation of pre-mRNPs (5)                                                         |
| 40  | 59  | 2  | 1.10e-15 | 107 | REAC:72172  | re | mRNA Splicing (5)                                                                  |
| 40  | 59  | 2  | 1.10e-15 | 107 | REAC:72163  | re | mRNA Splicing - Major Pathway (6)                                                  |
| 39  | 58  | 2  | 1.92e-15 | 105 | REAC:156661 | re | Formation of Exon Junction Complex (7)                                             |
| 35  | 53  | 2  | 4.55e-15 | 92  | REAC:72127  | re | Formation of the Spliceosomal B Complex (7)                                        |
| 39  | 58  | 2  | 5.50e-16 | 103 | REAC:72143  | re | Lariat Formation and 5'-Splice Site Cleavage (7)                                   |
| 39  | 58  | 2  | 1.92e-15 | 105 | REAC:72160  | re | Cleavage at the 3'-Splice Site and Exon Ligation (7)                               |
| 29  | 35  | 2  | 2.11e-09 | 61  | REAC:72107  | re | Formation of the Spliceosomal E complex (7)                                        |
| 40  | 59  | 2  | 1.66e-16 | 104 | REAC:72130  | re | Formation of an intermediate Spliceosomal C complex (7)                            |
| 33  | 46  | 2  | 9.89e-14 | 77  | REAC:72124  | re | Formation of the Spliceosomal A Complex (7)                                        |
| 39  | 58  | 2  | 2.89e-16 | 102 | REAC:72139  | re | Formation of the active Spliceosomal C complex (7)                                 |
| 6   | 23  |    | 9.77e-05 | 44  | REAC:72165  | re | mRNA Splicing - Minor Pathway (6)                                                  |
| 6   | 23  |    | 9.77e-05 | 44  | REAC:75081  | re | Formation of AT-AC B Complex (7)                                                   |
| 6   | 23  |    | 9.77e-05 | 44  | REAC:75079  | re | Formation of AT-AC C complex (7)                                                   |
| 4   | 17  |    | 8.12e-04 | 30  | REAC:75080  | re | Formation of AT-AC A complex (7)                                                   |
| 6   | 23  |    | 9.77e-05 | 44  | REAC:75083  | re | ATAC spliceosome mediated 3' splice site cleavage, exon ligation (7)               |
| 6   | 23  |    | 9.77e-05 | 44  | REAC:75082  | re | ATAC spliceosome mediated Lariat formation, 5' splice site cleavage (7)            |
| 6   | 21  | 11 | 1.65e-02 | 49  | REAC:379724 | re | tRNA Aminoacylation (2)                                                            |
| 6   | 18  | 11 | 1.19e-05 | 27  | REAC:379716 | re | Cytosolic tRNA aminoacylation (3)                                                  |
| 3   | 8   | 5  | 2.79e-03 | 9   | REAC:380008 | re | lysine + tRNA(Lys) + ATP => Lys-tRNA(Lys) + AMP + pyrophosphate (4)                |
| 3   | 8   | 5  | 2.79e-03 | 9   | REAC:379861 | re | glutamate + tRNA(Glu) + ATP => Glu-tRNA(Glu) + AMP + pyrophosphate (4)             |
| 3   | 8   | 5  | 2.79e-03 | 9   | REAC:379893 | re | isoleucine + tRNA(Ile) + ATP => Ile-tRNA(Ile) + AMP + pyrophosphate (4)            |
| 3   | 8   | 5  | 2.79e-03 | 9   | REAC:379993 | re | arginine + tRNA(Arg) + ATP => Arg-tRNA(Arg) + AMP + pyrophosphate (4)              |
| 3   | 8   | 5  | 2.79e-03 | 9   | REAC:379982 | re | glutamine + tRNA(Gln) + ATP => Gln-tRNA(Gln) + AMP + pyrophosphate (4)             |
| 3   | 8   | 5  | 2.79e-03 | 9   | REAC:379865 | re | proline + tRNA(Pro) + ATP => Pro-tRNA(Pro) + AMP + pyrophosphate (4)               |
| 3   | 8   | 5  | 2.79e-03 | 9   | REAC:379974 | re | leucine + tRNA(Leu) + ATP => Leu-tRNA(Leu) + AMP + pyrophosphate (4)               |
| 3   | 8   | 5  | 2.79e-03 | 9   | REAC:379867 | re | aspartate + tRNA(Asp) + ATP => Asp-tRNA(Asp) + AMP + pyrophosphate (4)             |
| 3   | 8   | 5  | 2.79e-03 | 9   | REAC:379994 | re | methionine + tRNA(Met) + ATP => Met-tRNA(Met) + AMP + pyrophosphate (4)            |
| 72  | 91  | 55 | 1.98e-16 | 206 | REAC:392499 | re | Metabolism of proteins (1)                                                         |
| 61  | 75  | 43 | 2.42e-23 | 126 | REAC:72766  | re | Translation (2)                                                                    |
| 46  | 60  | 33 | 1.51e-20 | 94  | REAC:156842 | re | Eukaryotic Translation Elongation (3)                                              |
| 43  | 58  | 30 | 9.36e-20 | 91  | REAC:156902 | re | Peptide chain elongation (4)                                                       |
| 41  | 56  | 28 | 1.30e-18 | 89  | REAC:156912 | re | Peptide transfer from P-site tRNA to the A-site tRNA (5)                           |
| 42  | 57  | 29 | 3.50e-19 | 90  | REAC:156907 | re | Aminoacyl-tRNA binds to the ribosome at the A-site (5)                             |
| 43  | 58  | 30 | 9.36e-20 | 91  | REAC:156915 | re | Translocation of ribosome by 3 bases in the 3' direction (5)                       |
| 42  | 57  | 29 | 3.50e-19 | 90  | REAC:156923 | re | Hydrolysis of eEF1A:GTP (5)                                                        |
| 4   | 3   | 4  | 5.00e-02 | 4   | REAC:156913 | re | Regeneration of eEF1A:GTP by eEF1B activity (4)                                    |
| 41  | 57  | 28 | 7.79e-19 | 91  | REAC:72764  | re | Eukaryotic Translation Termination (3)                                             |
| 41  | 57  | 28 | 7.79e-19 | 91  | REAC:141671 | re | Polypeptide release from the eRF3-GDP:eRF1:mRNA:80S Ribosome complex (4)           |
| 41  | 57  | 28 | 7.79e-19 | 91  | REAC:141691 | re | GTP bound eRF3:eRF1 complex binds the peptidyl tRNA:mRNA:80S Ribosome compl... (4) |

|    |    |    |          |     |             |    |                                                                                    |
|----|----|----|----------|-----|-------------|----|------------------------------------------------------------------------------------|
| 41 | 57 | 28 | 7.79e-19 | 91  | REAC:141673 | re | GTP Hydrolysis by eRF3 bound to the eRF1:mRNA:polypeptide:80S Ribosome comp... (4) |
| 56 | 70 | 38 | 3.26e-21 | 119 | REAC:72613  | re | Eukaryotic Translation Initiation (3)                                              |
| 56 | 70 | 38 | 3.26e-21 | 119 | REAC:72737  | re | Cap-dependent Translation Initiation (4)                                           |
| 47 | 62 | 32 | 5.80e-20 | 101 | REAC:72689  | re | Formation of a pool of free 40S subunits (5)                                       |
| 41 | 56 | 29 | 2.86e-18 | 90  | REAC:72673  | re | Release of 40S and 60S subunits from the 80S ribosome (6)                          |
| 23 | 33 | 20 | 7.00e-11 | 51  | REAC:72676  | re | eIF3 and eIF1A bind to the 40S subunit (6)                                         |
| 23 | 35 | 22 | 1.18e-11 | 54  | REAC:72695  | re | Formation of the ternary complex, and subsequently, the 43S complex (5)            |
| 23 | 35 | 22 | 1.18e-11 | 54  | REAC:72691  | re | Formation of the 43S pre-initiation complex (6)                                    |
| 30 | 38 | 25 | 1.31e-11 | 62  | REAC:72662  | re | Activation of the mRNA upon binding of the cap-binding complex and eIFs, an... (7) |
| 29 | 38 | 25 | 6.12e-12 | 61  | REAC:72649  | re | Translation initiation complex formation (6)                                       |
| 29 | 38 | 25 | 6.12e-12 | 61  | REAC:156808 | re | Formation of translation initiation complexes yielding circularized Cerulop... (7) |
| 28 | 38 | 24 | 2.78e-12 | 60  | REAC:157849 | re | Formation of translation initiation complexes containing mRNA that does not... (7) |
| 28 | 39 | 25 | 7.59e-13 | 61  | REAC:72702  | re | Ribosomal scanning and start codon recognition (5)                                 |
| 28 | 38 | 24 | 2.78e-12 | 60  | REAC:72621  | re | Ribosomal scanning (6)                                                             |
| 28 | 39 | 25 | 7.59e-13 | 61  | REAC:72697  | re | Start codon recognition (6)                                                        |
| 53 | 69 | 37 | 1.43e-22 | 112 | REAC:72706  | re | GTP hydrolysis and joining of the 60S ribosomal subunit (5)                        |
| 28 | 39 | 25 | 7.59e-13 | 61  | REAC:72619  | re | eIF2:GTP is hydrolyzed, eIFs are released (6)                                      |
| 42 | 57 | 28 | 3.50e-19 | 90  | REAC:72672  | re | The 60S subunit joins the translation initiation complex (6)                       |
| 42 | 57 | 28 | 3.50e-19 | 90  | REAC:72671  | re | eIF5B:GTP is hydrolyzed and released (6)                                           |
| 14 | 35 | 32 | 6.66e-11 | 74  | REAC:174184 | re | Cdc20:Phospho-APC/C mediated degradation of Cyclin A (1)                           |
| 14 | 35 | 32 | 6.66e-11 | 74  | REAC:174255 | re | Degradation multiubiquitinated Cyclin A (2)                                        |
| 46 | 78 | 48 | 3.25e-08 | 216 | REAC:162906 | re | HIV Infection (1)                                                                  |
| 37 | 66 | 48 | 3.60e-12 | 145 | REAC:162909 | re | Host Interactions of HIV factors (2)                                               |
| 12 | 35 | 33 | 1.36e-15 | 59  | REAC:180534 | re | Vpu mediated degradation of CD4 (3)                                                |
| 12 | 35 | 33 | 1.36e-15 | 59  | REAC:180573 | re | Degradation of ubiquitinated CD4 (4)                                               |
| 11 | 15 | 4  | 3.70e-02 | 31  | REAC:177243 | re | Interactions of Rev with host cellular proteins (3)                                |
| 14 | 36 | 33 | 5.43e-15 | 61  | REAC:180585 | re | Vif-mediated degradation of APOBEC3G (3)                                           |
| 14 | 36 | 33 | 5.43e-15 | 61  | REAC:180603 | re | Proteasome-mediated degradation of APOBEC3G (4)                                    |
| 2  | 1  | 4  | 5.00e-02 | 4   | REAC:114592 | re | Collagen adhesion via alpha 2 beta 1 glycoprotein (1)                              |
| 2  | 1  | 4  | 5.00e-02 | 4   | REAC:114563 | re | Adhesion via alpha 2 beta 1 glycoprotein (2)                                       |
| 30 | 28 | 56 | 1.99e-07 | 234 | REAC:109582 | re | Hemostasis (1)                                                                     |
| 11 | 9  | 11 | 2.50e-03 | 23  | REAC:350701 | re | Further platelet releasate (2)                                                     |
| 14 | 12 | 29 | 2.50e-03 | 118 | REAC:75178  | re | Formation of Platelet plug (2)                                                     |
| 14 | 8  | 24 | 2.96e-02 | 101 | REAC:76002  | re | Platelet Activation (3)                                                            |
| 9  | 3  | 14 | 7.76e-04 | 33  | REAC:114509 | re | Platelet activation triggers (4)                                                   |
| 6  | 3  | 11 | 1.07e-02 | 26  | REAC:114696 | re | Thrombin signalling through PARs (5)                                               |
| 5  | 3  | 11 | 6.79e-03 | 25  | REAC:114665 | re | Thrombin signalling G-protein cascades (6)                                         |
| 4  | 3  | 10 | 2.96e-02 | 24  | REAC:114664 | re | Proteinase activated receptor G alpha (12/13) cascade (7)                          |
| 6  | 7  | 6  | 1.24e-02 | 8   | REAC:390471 | re | Association of TriC/CCT with target proteins during biosynthesis (1)               |
| 6  | 7  | 6  | 1.24e-02 | 8   | REAC:391266 | re | Association of CCT/TriC with sphingosine kinase 1 (2)                              |
| 6  | 7  | 6  | 2.03e-03 | 7   | REAC:390470 | re | Association of CCT/TriC with other substrates during biosynthesis (unknown ... (2) |
| 6  | 4  | 1  | 4.13e-02 | 8   | REAC:162592 | re | Integration of provirus (1)                                                        |
| 7  | 6  | 2  | 4.98e-02 | 11  | REAC:109968 | re | Repair synthesis of ~27-30 bases long patch by DNA Pol Epsilon (1)                 |
| 42 | 59 | 45 | 7.86e-10 | 144 | REAC:109581 | re | Apoptosis (1)                                                                      |
| 13 | 35 | 32 | 7.92e-15 | 58  | REAC:169911 | re | Regulation of Apoptosis (2)                                                        |
| 13 | 35 | 32 | 3.92e-15 | 57  | REAC:211733 | re | Regulation of activated PAK-2p34 by proteasome mediated degradation (3)            |
| 13 | 35 | 32 | 3.92e-15 | 57  | REAC:211715 | re | Proteasome mediated degradation of PAK-2p34 (4)                                    |
| 23 | 17 | 9  | 3.30e-07 | 45  | REAC:75153  | re | Apoptotic execution phase (2)                                                      |
| 18 | 14 | 8  | 1.72e-04 | 39  | REAC:111465 | re | Apoptotic cleavage of cellular proteins (3)                                        |
| 9  | 1  | 3  | 1.81e-03 | 13  | REAC:264870 | re | Caspase-mediated cleavage of cytoskeletal proteins (4)                             |
| 5  | 6  | 11 | 4.19e-03 | 24  | REAC:194854 | re | GDI blocks activation of Rho GTPase:GDP (1)                                        |
| 2  | 14 | 7  | 1.39e-02 | 26  | REAC:265088 | re | Translocation of Preproinsulin to Endoplasmic Reticulum (1)                        |
| 12 | 34 | 32 | 1.58e-11 | 71  | REAC:188191 | re | APC/C:Cdh1-mediated degradation of Skp2 (1)                                        |

|         |     |          |       |             |    |                                                                |
|---------|-----|----------|-------|-------------|----|----------------------------------------------------------------|
| 7       | 3   | 1.37e-02 | 8     | REAC:203973 | re | Vesicle Budding (1)                                            |
|         |     | P-value  | T     | term ID     |    | term domain and name                                           |
| 557835  | 548 | 1.34e-18 | 6723  | TF:M00931_4 | tf | Factor: Sp1; motif: GGGGCGGGGC; match class: 4 (1)             |
| 534782  | 518 | 2.24e-15 | 6375  | TF:M00931_3 | tf | Factor: Sp1; motif: GGGGCGGGGC; match class: 3 (2)             |
| 492703  | 468 | 3.54e-15 | 5645  | TF:M00931_2 | tf | Factor: Sp1; motif: GGGGCGGGGC; match class: 2 (3)             |
| 4236134 | 18  | 7.66e-12 | 5025  | TF:M00931_1 | tf | Factor: Sp1; motif: GGGGCGGGGC; match class: 1 (4)             |
| 275407  | 288 | 2.95e-14 | 3020  | TF:M00931_0 | tf | Factor: Sp1; motif: GGGGCGGGGC; match class: 0 (5)             |
| 41      | 62  | 6.33e-03 | 366   | TF:M00920_4 | tf | Factor: E2F; motif: NKCGCGCSAAN; match class: 4 (1)            |
| 308484  | 275 | 1.21e-04 | 4083  | TF:M00623_4 | tf | Factor: Crx; motif: YNNNTAATCYSMN; match class: 4 (1)          |
| 278433  | 253 | 2.94e-04 | 3680  | TF:M00623_3 | tf | Factor: Crx; motif: YNNNTAATCYSMN; match class: 3 (2)          |
| 197311  | 159 | 1.44e-03 | 2521  | TF:M00327_4 | tf | Factor: Pax-3; motif: NNNNNCGTCACGSTYNNNNN; match class: 4 (1) |
| 111     | 68  | 9.43e-03 | 1124  | TF:M00426_4 | tf | Factor: E2F; motif: TTTSGCGS; match class: 4 (1)               |
| 27      | 55  | 2.37e-02 | 327   | TF:M00187_1 | tf | Factor: USF; motif: GYCACGTGNC; match class: 1 (1)             |
| 21      | 42  | 4.18e-02 | 234   | TF:M00187_0 | tf | Factor: USF; motif: GYCACGTGNC; match class: 0 (2)             |
| 259391  | 196 | 5.30e-18 | 2607  | TF:M00025_4 | tf | Factor: Elk-1; motif: NNNNCCGGGAARTNN; match class: 4 (1)      |
| 216334  | 166 | 7.82e-18 | 2130  | TF:M00025_3 | tf | Factor: Elk-1; motif: NNNNCCGGGAARTNN; match class: 3 (2)      |
| 133213  | 100 | 5.13e-16 | 1252  | TF:M00025_2 | tf | Factor: Elk-1; motif: NNNNCCGGGAARTNN; match class: 2 (3)      |
| 438621  | 114 | 6.07e-03 | 5773  | TF:M00189_4 | tf | Factor: AP-2; motif: MKCCSCNGGCG; match class: 4 (1)           |
| 73211   | 657 | 3.23e-47 | 8691  | TF:M00803_0 | tf | Factor: E2F; motif: GGCGSG; match class: 0 (1)                 |
| 204313  | 172 | 3.07e-05 | 2485  | TF:M01035_4 | tf | Factor: YY1; motif: NYNKCCATNTT; match class: 4 (1)            |
| 184283  | 147 | 7.32e-07 | 2087  | TF:M01035_3 | tf | Factor: YY1; motif: NYNKCCATNTT; match class: 3 (2)            |
| 116193  | 97  | 9.24e-09 | 1242  | TF:M01035_2 | tf | Factor: YY1; motif: NYNKCCATNTT; match class: 2 (3)            |
| 101125  | 67  | 9.22e-03 | 989   | TF:M00916_4 | tf | Factor: CREB; motif: NNTKACGTCANNNS; match class: 4 (1)        |
| 87      | 104 | 4.25e-02 | 856   | TF:M00916_3 | tf | Factor: CREB; motif: NNTKACGTCANNNS; match class: 3 (2)        |
| 183293  | 179 | 1.47e-03 | 2401  | TF:M00796_3 | tf | Factor: USF; motif: NRCCACGTGASN; match class: 3 (1)           |
| 567807  | 534 | 1.49e-10 | 6969  | TF:M00933_4 | tf | Factor: Sp1; motif: CCCCCCCCCN; match class: 4 (1)             |
| 500724  | 476 | 1.92e-10 | 6053  | TF:M00933_3 | tf | Factor: Sp1; motif: CCCCCCCCCN; match class: 3 (2)             |
| 4236134 | 18  | 2.09e-12 | 5018  | TF:M00933_2 | tf | Factor: Sp1; motif: CCCCCCCCCN; match class: 2 (3)             |
| 391562  | 378 | 3.14e-09 | 4601  | TF:M00933_1 | tf | Factor: Sp1; motif: CCCCCCCCCN; match class: 1 (4)             |
| 219311  | 207 | 1.63e-02 | 2633  | TF:M00933_0 | tf | Factor: Sp1; motif: CCCCCCCCCN; match class: 0 (5)             |
| 219362  | 209 | 2.85e-03 | 3020  | TF:M00122_3 | tf | Factor: USF; motif: NNRNCACGTGNYNN; match class: 3 (1)         |
| 184303  | 176 | 3.65e-04 | 2465  | TF:M00122_2 | tf | Factor: USF; motif: NNRNCACGTGNYNN; match class: 2 (2)         |
| 85      | 143 | 1.50e-02 | 1056  | TF:M00122_1 | tf | Factor: USF; motif: NNRNCACGTGNYNN; match class: 1 (3)         |
| 224372  | 216 | 2.71e-03 | 3113  | TF:M00726_0 | tf | Factor: USF2; motif: CASGYG; match class: 0 (1)                |
| 512744  | 482 | 3.90e-03 | 6839  | TF:M00915_4 | tf | Factor: AP-2; motif: SNNCCNCAGGCN; match class: 4 (1)          |
| 452644  | 415 | 3.95e-02 | 5894  | TF:M00915_3 | tf | Factor: AP-2; motif: SNNCCNCAGGCN; match class: 3 (2)          |
| 809127  | 807 | 3.74e-02 | 12686 | TF:M01100_3 | tf | Factor: LRF; motif: VNNRMCCCC; match class: 3 (1)              |
| 311443  | 228 | 2.92e-13 | 3275  | TF:M00431_4 | tf | Factor: E2F-1; motif: TTTSGCGS; match class: 4 (1)             |
| 284142  | 202 | 3.52e-12 | 3023  | TF:M00431_3 | tf | Factor: E2F-1; motif: TTTSGCGS; match class: 3 (2)             |
| 125     | 70  | 1.02e-03 | 1277  | TF:M00431_2 | tf | Factor: E2F-1; motif: TTTSGCGS; match class: 2 (3)             |
| 83      | 106 | 1.14e-02 | 778   | TF:M00431_1 | tf | Factor: E2F-1; motif: TTTSGCGS; match class: 1 (4)             |
| 35      | 46  | 4.96e-02 | 266   | TF:M00652_0 | tf | Factor: NrF-1; motif: CGCATGCGCR; match class: 0 (1)           |
| 79      | 92  | 2.12e-02 | 744   | TF:M00041_0 | tf | Factor: ATF2:c-Jun; motif: TGACGTYA; match class: 0 (1)        |
| 121175  | 80  | 1.52e-06 | 1167  | TF:M00940_4 | tf | Factor: E2F-1; motif: NTTTCGCGCS; match class: 4 (1)           |
| 93      | 124 | 1.58e-02 | 905   | TF:M00940_3 | tf | Factor: E2F-1; motif: NTTTCGCGCS; match class: 3 (2)           |
| 253393  | 210 | 2.24e-02 | 3405  | TF:M00793_4 | tf | Factor: YY1; motif: GCCATNTTN; match class: 4 (1)              |
| 212394  | 168 | 2.91e-04 | 2644  | TF:M00793_3 | tf | Factor: YY1; motif: GCCATNTTN; match class: 3 (2)              |

|           |          |      |             |    |                                                           |
|-----------|----------|------|-------------|----|-----------------------------------------------------------|
| 21423100  | 2.91e-04 | 2044 | TF:M00793_1 | tf | Factor: YY1; motif: GCGHNTIN; match class: 1 (2)          |
| 733105594 | 1.65e-28 | 8550 | TF:M00428_4 | tf | Factor: E2F-1; motif: NKTSSCGC; match class: 4 (1)        |
| 623919493 | 1.91e-25 | 7274 | TF:M00428_3 | tf | Factor: E2F-1; motif: NKTSSCGC; match class: 3 (2)        |
| 400585301 | 7.65e-14 | 4523 | TF:M00428_2 | tf | Factor: E2F-1; motif: NKTSSCGC; match class: 2 (3)        |
| 216160    | 1.60e-03 | 2398 | TF:M00428_1 | tf | Factor: E2F-1; motif: NKTSSCGC; match class: 1 (4)        |
| 8310642   | 1.14e-02 | 778  | TF:M00428_0 | tf | Factor: E2F-1; motif: NKTSSCGC; match class: 0 (5)        |
| 639943589 | 4.87e-04 | 8762 | TF:M00800_4 | tf | Factor: AP-2; motif: GSCCSCRGCCNRNRNN; match class: 4 (1) |
| 576866564 | 1.54e-17 | 7083 | TF:M00932_4 | tf | Factor: Sp1; motif: NNGGGCGGGGNN; match class: 4 (1)      |
| 548622530 | 2.90e-18 | 6609 | TF:M00932_3 | tf | Factor: Sp1; motif: NNGGGCGGGGNN; match class: 3 (2)      |
| 489703464 | 2.69e-13 | 5680 | TF:M00932_2 | tf | Factor: Sp1; motif: NNGGGCGGGGNN; match class: 2 (3)      |
| 361515346 | 2.54e-10 | 4077 | TF:M00932_1 | tf | Factor: Sp1; motif: NNGGGCGGGGNN; match class: 1 (4)      |
| 124185120 | 1.11e-02 | 1422 | TF:M00932_0 | tf | Factor: Sp1; motif: NNGGGCGGGGNN; match class: 0 (5)      |
| 588663566 | 9.27e-22 | 6923 | TF:M00196_4 | tf | Factor: Sp1; motif: NGGGGCGGGGYN; match class: 4 (1)      |
| 543795520 | 3.98e-18 | 6348 | TF:M00196_3 | tf | Factor: Sp1; motif: NGGGGCGGGGYN; match class: 3 (2)      |
| 442626425 | 2.61e-13 | 5066 | TF:M00196_2 | tf | Factor: Sp1; motif: NGGGGCGGGGYN; match class: 2 (3)      |
| 318454326 | 2.51e-14 | 3578 | TF:M00196_1 | tf | Factor: Sp1; motif: NGGGGCGGGGYN; match class: 1 (4)      |
| 125183121 | 4.58e-03 | 1437 | TF:M00196_0 | tf | Factor: Sp1; motif: NGGGGCGGGGYN; match class: 0 (5)      |
| 287422204 | 3.62e-13 | 3054 | TF:M00427_4 | tf | Factor: E2F; motif: TTTSGCGS; match class: 4 (1)          |
| 195128    | 2.16e-04 | 2063 | TF:M00427_3 | tf | Factor: E2F; motif: TTTSGCGS; match class: 3 (2)          |
| 138222132 | 2.68e-05 | 1620 | TF:M00187_4 | tf | Factor: USF; motif: GYCACGTGNC; match class: 4 (1)        |
| 108191112 | 1.13e-05 | 1335 | TF:M00187_3 | tf | Factor: USF; motif: GYCACGTGNC; match class: 3 (2)        |
| 11115171  | 1.35e-02 | 1124 | TF:M00938_4 | tf | Factor: E2F-1; motif: TTGGCGCGRAANNM; match class: 4 (1)  |
| 442635357 | 5.56e-09 | 5257 | TF:M00695_0 | tf | Factor: ETF; motif: GVGGMGG; match class: 0 (1)           |
| 198270151 | 2.89e-04 | 2110 | TF:M00801_0 | tf | Factor: CREB; motif: CGTCAN; match class: 0 (1)           |
| 714103671 | 2.42e-17 | 8876 | TF:M00008_4 | tf | Factor: Sp1; motif: GGGGCGGGGT; match class: 4 (1)        |
| 664979636 | 6.18e-18 | 8219 | TF:M00008_3 | tf | Factor: Sp1; motif: GGGGCGGGGT; match class: 3 (2)        |
| 457654429 | 4.98e-15 | 5151 | TF:M00008_2 | tf | Factor: Sp1; motif: GGGGCGGGGT; match class: 2 (3)        |
| 115126    | 9.92e-04 | 1380 | TF:M00008_1 | tf | Factor: Sp1; motif: GGGGCGGGGT; match class: 1 (4)        |
| 6369      | 4.20e-02 | 712  | TF:M00008_0 | tf | Factor: Sp1; motif: GGGGCGGGGT; match class: 0 (5)        |
